# Supplementary material for: Genome-Wide Characterization and Expression Analysis of GeBP Family Genes in Soybean
Source: MDPI journal article supplement (doi:10.3390/plants11141848), 2022-07-14
Supplement: s1 [file s1]

>GmGeBP1

AAAAATTTATAAAGAATCAGGAGATTAATTTAACTTAGAATATTTTTGTTCTCTAAATAA  
CATTATTAAGTATTTGAAAATGTAGAGGATAGTTTTTAATACGATAAAAAAATAAAAAA  
TGTAAGTGCAGCGTTGCGTTTGTGGCGAAAGAAGAGGTACATTCTTGTAATAAATAA  
AATACGGGGGGTTTGGTTGGTCCACTAGGCTACCTAACTAACTAAAAACCAAAACCCA  
AAACCAGCCTTGGGATTCCCCATTACCAGCAGCGAAGTAGAGGTGAGTTTGATTGAGTC  
AGTCCAACAATAACTAAAAACCGTGACTCAGCCCACTCTTGCTTTGCTTGGCCTAACCG  
CTAACCAAAACCAAGCTCTCTCAATGGCTTCGGAGCAACACGACGCCGTTTTCCGCGAAG  
AAGACATGGACGACGACGACGAGTCTCAGGAGGACGAAGGTACGAAGAAGACGACG  
ACGAAGAAAACGTGCCCTCTCCCTCCACCGTCTCGCTGTACCGTCGCCGTCCCCGGTT  
CCGCCGTCTCCAACGGCGGGCGGTGGCTCTCCAATTTCAAGCCCACCGCCACCGCCACCA  
CCGCCACCATCGTCTCGCCGACTCATCCGATCCGAAGCGGCGTCGCCTGGAGCTAATCG  
AGGAGAAAAAGCCGCCGCCGCCGCTGGATGACTCGCGGCGGCTGTTTCAGCGGCTGTGGA  
CCGATGAGGATGAGATCGAGCTCTTGCAAGGGTTCCTCGACTACACATCGCAGCGAGGAT  
CCTCGCACCACAACGACACCGCTTTGTTCTACGACCAAATCAAGTCGAAGCTCCTAACTCG  
ATTTCAACAAGAATCAGCTCGTGGAGAAGATCCGAAGGCTGAAGAAGAAGTACCGGAACG  
TCCTCAACAAGATTTGCTCCGCAAGGAATTCTCTCAAGAGCGCTCACGATCAAGCCA  
CCTTCGAAATCTCGCGCAAGATCTGGAGCAACGTGACTCCAGTCGGCGACAATTCATTGG  
ACGACGACGAAATCAACCCTAGCCGTAGCCCCAACCTAACCTTAATTTAGCCCTGTAA  
TTCTTAAGAATGAAACGATTTTCAGGAATTCACGGAAGAAAAACCGAAACGCTCTC  
GGCCTCGATCGGCGGTGAAATCGAGCCAAATGACGGATCCGCGTCGAACAGAGATCATA  
ATTGTATTAGCAATACTACACCTACTGCTACTGCTGCTACTAACAATACTGCTGCTG  
CTGCTGCTGGTACTAACAATAAATACTGTAACAGTGGTTATGGAATAACATACCGAGTT  
TGATTGAGGAGACGGTGAAGAGTTGTTTGTGCGCGGTGTTGAAGGAATTGATGGCAGGGG  
CCATGGGAGGAGGAGCGTTTGGAGGGAGAGGGTTTTCGTTGAACTTGAACCTATGCCTT  
TTATGAATTTGAGTTTGGCGGTGGGGAAATGGTGGATGAGAAATGGAGGAAGCAACAGA  
TATTGGAGTTGGAAGTGATTCTGAAGCGGTGGAACCTGGTGCAGGATCAGATCAAGGCAG  
CTATGGAGGAGTTGCGGTCACATGGAGGAGGAGGATTATAGTTTGTGTTTTGGTTTTGTAG  
CGAGTGATTGGAGTTCTTCTTGCTCTTCGTGTTCACTTCATCATACGGATTTGCTTGGTA  
ATTTATCCATCAATGGTTGGTTCATACTCATAGCTTAGAAGTTAGCTAGTCGTAGTAACT  
TGTAAGTGGAATACTAGTGTGTTTTCTTTTCGGTTTTAGCTTTCGCTGATTCGGTAGAGCAC  
TTGTCCATTAAAAATAAAATGTTTTATTTTATATTTTAGCCGTTTTTATGTTCCTTAAA  
TTTCAATGGTCTCATACATGTACAGAACAGATTGAAATAATTGGTGGGAGTGATGGCTT  
TGTACCATTATATATATGTTGTAAAAGATGCGAAAGTAGTGGGTTCTCAATTGTGCAACG  
TTCTTCCTGAGCACTTTGTTCTTAAAAGTATATCTTTCGTATTTTTATGATTCAATTGAT  
TGTTAAAGATGGCATTCTTATCTGAG

>GmGeBP2

GACAATCATTGTTCTCCTCAAAGCACCAAAACAAATTGTCAAAGTATTAGAAAAGATTAGAT  
AGGGAGAGGGTTTTGACAAACAATGATGTCAAGTGACCGGATCACCTTAAATTTGGTCC  
GCCTTTACTATTTTCTTTTCCCGGCGAAGTCCGCGGTTTCTATTTGGTATCTGCATTTCT  
CCACCAGGATTTTTCAATTCCATTGTGAGTGCCACACAAGTGGCTCTGTTGTATATGG  
CCTAGTCATACTTCTCAGTTCTCACTCTCACTCCGTAGAAAGAACCTAGAATCAGAATT  
CTCCGTCTATGTTGCAGAAGCAGCTACCTCCCCCATTTGAGGCCTCTTCCGATGAAGAGC  
AACGACCTTCCTCCAAGCAACACACAGAAGAAGGAGTTTCCTCTTCAGAAGAAGCTTCTT

CCCAAGAAGAAGACGACGACGACCAACCTCCCACCCTTCCTCTCGCTTCCGCAAACCCCC  
ACCCGAAACCGTCGTCCTCCGACTCCGACACCGACTTCGAGCCCACCAAAGTAAAACCCA  
AGCCCCACGGACCAGGCCAGAACGCCCTCACC CGCGCCGCCCCAAATGGGGATCCA  
AGCGCCCTGCCAGAACACGCCCTGCCACTGACCCGAAACGCGCGAAGAAGAAATTGA  
CCAATTCTTCTCCGCCGCTGCCGCCACGAGACGGAGGAGAAGTCCGGTGGCGGCCAAG  
CGAAGTTGTCTCAGAGACTCTTCAGCAAGGAAGACGAACTCGCCATTCTTAAGGGCATGG  
CTGAGTTCATTTGGAAGACGGGCCAAGACCCTTACAAGTACGCCGATGCCTTCCAAAATT  
TCGTTAAGAATTTCGTCGCGTGGAGGCTTCGAGCAACCAGATCAAGGAGAAGATCCGAC  
GGCTGAAGAAGAAGTTTGAACTAAAGCACAGAGAGCGAAGAAATGGGAGGACCCTGAGT  
TCTCCAAATTTACGACCGGACTGTGTTGAATTATCAAAGAAGGTTTGGGGAGAAGGAG  
CCAATGGGCTGGTGGAGAAGCCAAACCTAATAATGGAAGAAAGAAACTGCCAAGACTC  
CAAAGAAGGATGCTACTAGCAGGAATGTAGTAGCAAAATCTGAACTACAACACTACTGG  
AGTCGATGGAGTTGGAGGAGTGTGGAATGTAAATTTGCTTTACCGCGAAGTATCTGGTT  
TCAAAGAACTGAATGAGGATGAGATGAAGAGGGGATTGGCGTTAATTGGAGAATCTAAGA  
GGAAAGAGTTGGAGGGCAAGTGGAGGAAATTGCGACTTGCTGAGATGGAAGTGGTTGCGA  
ATCGCTCACTACTTATTGGGGAGCAGATTAAAGTTGATATTTGAAGCACTTCAGTAATCCA  
ACAAGTGGGTTTATTGTGTTAGGTATCACTTTTTGCCTTTTCGGTACTGCCTGCCATAT  
GTATTGTGGATCATTGTAATTTGTGTCTATGGTATTGATATAGTCTTTTTTATTAAGTA  
GGCAGTGTGTTTAGTTGTTGGCCTTGTGAAATGTGCCGCATAGTCGTCCATTTCAGGT  
TCTCTTTTTCAATTAAGATGTGCCATCATTAACCTCCAGAAATGCCGAAATTAACACTT  
ACCATTTTGTGTAGATATATGATGGACACATCATGGTTATGTGTACGTTTCAGATCACCG  
CTACTTACGTGAAAGGCAATATTGCTCTGACTTAGAAAGTTTTAGTCTTGATTAATTGT  
GCATTGTGGGTTCAATGGTGTTAAGTAACTGTTATAGTGCCATAACATTATAACCTGTGG  
TTTTTGATCCCTCCACCTTAGGCAATTTGTGAAGGGAGGGCCACTATGATGGTGCCATAG  
GCTACAATGGTGTGTTTATATGGCGAAATTCAGCATTCCACCCTGATAACCTCAAGTG  
GGTTTTGTCTTAATCATCATCCTTGGTGTTTATAAGGGAGGCCATTTGATGCACTTGGTA  
GCATAGCCTTTTCAAATCTTAGTAACAAGTAGCAAAATTTATTAACCATTTTAATAAATA  
ATGGAGAAATATGTGGTGCCAGTTATGGCAATATGTTCAATCAGGCAAATCCTTATTTG  
TTAACTGTGGGTTTGCAATTTGGGATGGCTGGAACATTATCATCACCAAGGCCTGGCTG  
GGGATCATGGAATGAACTGCCTTGTGTAACTGTCTATTGCAATGACATTGCTGCGTTTG  
CCCTTGCTCCTTTTGTGCTTATAACTTTGAAAAGTGCAACTATTTTGTGATACATCTAA  
AATTACTAATGCATATGCTCTTTACAAACAAGTGTAGTTTTCAGCACATAATCCATATGT  
CATGTTTGTAACTATTCTTTTACAACCTTTAAAATTTTGGGACAAGGTTTCTCTTAACAT  
AATTTATTTCGGAATGGAACCTCTGTAGTAAAGTAGTCTATGGGCAAATTCATTGAACTC  
CTTGAGATCTGTTTAAATATCACCAACACTTCCTTTATTTTCTTAAATCTCTAACCTTT  
CTCACATTGGCACTGTTTAGCTACTGTTTTAAAAGGAAAAGACTTTTCTTTTAGCTATTT  
GTTTTTGCCTCTTTTGGCAATCTCACTTGCTATATTGTTCTGAAATATGCTAGTTAGG  
CAACTCCATCCCTAAATAAGATGTGTGCACCAAAAAATGACTATGCTGGGAAACTTGGA  
CTATTTTCACAAGTCGAAACACTAATCAGAGGCCTCACACTTCTTACTTCTTCAGAAAT  
CCCAAAAGTAAATAGAAGGGAAGTGCTCCAAAAAGTATATGTTTAAGATGCTGAAACACA  
TTCCAAGTTTGCAAAGCTTATTTTGCAATTGTAAAATTTAAGCTATAGATTTAAAGACTT  
GCTCTTAGGATAGCAAGTATCTCTTGCATATATACCCCACTTGAAAATGCCAAGAACC  
TATTCTCTGGGAGCCGAATAAGGTAGATAATACAGAGTCCAAATGTTGGTAAGTTTGTG  
TGTCCAAATACTCTTTTTTGTCTCATGGAAGGGGAAGGTTACACTTGGTACATCTCTA

TAGTCTTCTGATTAATTGGGTGAGTCTTTTCTAGAGATTATTGTCCCCATCACCATGTG  
CTAGTTTTTCTAGAAGAATCTTTTGGCATCCTTGTGTTCTATTTCAATTTTAAAGTATAT  
AACTTTTAACTTTTATGCTTTTAGATTAAATATGTTTTATTTTAAATTATTATCGTAGC  
TTACTATGCCTGTCACAGATGCAATCATTAAATTATTATGCTTTAACTGGGAATGCTCAT  
TTTTGACCTAGTGTGATCATGCAGTAGTAAATGCTTGTGTTTTGTTTGAAGAGTTTGC  
TTTGTGTTGCTTGGAATTGACTACCTATGAAATTTCTTGTTATGGTCTGCCATCATTTT  
GAACAAACATCATTTTACCTTTGCTCTGTGATTCTTTTGTGTCTTGCTATGTTCTGTAAC  
TGGTATTTACATCGTGCAGTCAACTTTTTGTGTCTCCCTCCTTTGTAAGGAGCTTCAATG  
TTTGCTGTCATTTGAAAGGGGCTCAATTGGTATGCTACAAAGGTAGATCTTTACAAGGTC  
AATTATTGTCTAAATACTGTAATATGTTATAGCAAATCATGGCCA

>GmGeBP3

ATGGAATCCGATCTAAACGACGCCGTTTTCCCCGAAGAAGATCTCGACGACGACGACGAC  
GATGAAACTCCAGAGGACGAAGAGGACTACGACGACGAAACCGAACCCCTCCCTTCGTC  
CTCGCCGTCGTAGCAGTCGCGCCGCCGCTTCCACCGCTCCGAAACACTCGACACCACG  
TTGATCCCGATCTCCGCCGTCGCCGATTCCCTCACTGAAACCACTGCACCCGGAGCTAATC  
GAGGAGAAAAAAGCGCTGGACGATTGCGCGGCGACTGTTCCAGCGTCTGTGGACGGACGAG  
GACGAGATCGGGCTCTTGCAGGGGTTTCTGGACTACACGGCGCAGCGAGGATCCTCTCAC  
CACAGCGATACCGCTTGTTCTACGACCAAATCAAGTCGAAGCTCCAACCTCGGCTTCAAC  
AAGAACCAGCTCGTCGAGAAGCTCCGAAGGCTGAAGAAGAAGTACCGCAACGTCGTCACC  
AAAATCAGCTCCGGCAAGGATGTCTCCTTCAAGAGCCCTCACGACAAAGCCACCTTCGAA  
ATCTCACGCGAGGATATGGAGCAACACCGCTCCAATAAGCGGTCCCGTCGAAGACGACGAC  
GAAATCAACCCTAACCTAATTTCCGCAATTCCGCGAAGACACCTATCTCGCGGAAGCGG  
TCGCGGCCCTCAGAAGCGCGAGTTGAACGACGGTTCAACATTGAATAGAGATAATAATTGT  
ATTGGCAATAATAATAATAATAGCAATAGTAATAATAATAATGAGAATTGTAATGGT  
AGGCATAAATTACAGGGTTTGATTGAAGAGACGGTTAAGAGTTGCGTGTGCGCCGGTGTG  
AAGGAGTTGGTGTGTTGACCGGTGGCATGGAATTGGGAAGAGGGTTTGAGTTGGAGGA  
GGGCTTGAGTTGGAGGAGGGCTTGCATTGAATTCCTTGCAAACCTCAAATGACAATGCCA  
ATGACTTTATTGAATTTGAGGATTGGGGAACAACGATGGATGAGAAGTGAGGAAGCAA  
CAGATTTTGAGCTGGAAGTGATTCCAAGCGTTTGAATTGGTGCAGGATGAGATCAAG  
GTTGCTCTCGAGGAGTTGCGATCAGCTGGAGGAGTATAACCCAAAATAAAACTGAGCTTT  
CAGGTGTTTACAGTACTATAATCCACTAATGGTTGATAGGGGTAGCTAGACAGTTGTA  
ATTTTTTTTTTATAGTTTAGCTTTTTTTCAGTATAGCTTTTGATTATTGCATACAGTATT  
TGTTCAATAAAACGTTCTTATTTTTGTTTATTTGACTTTTGTAATAATTCTTCTTGCTA  
ATTAATAATTTACATGTACAGATAGAGTCAAGGAATTGGCGCAAGATGAACGGCCTTGTA  
TTTTGATGTGTTGTTTAGTATGCAATTTTGGGTGAATTTCTTACGAAATTACATGTATC  
CCGCAGGGCTTTTGGGTTTTGTACTTTCTGAGCTGTGTTAGGATAGTGGTATGCAATGG  
CATATTCAGATCCTGAAACTTCTTTTGATGGTCATTCTCGTATCTCTCCTGGTATCTC  
ATCAGTGTGATCATTTGTGGATTTTGTGTATGGAAGTACTGAAAGTTGAAGATTTGAGA  
TTGGAATGAAGAGCAATTTCTGTTGTCTGTTATAATGCCATTCGGTAGTTATTACTACTA  
TTTGATTCAAGTAAAGTTGAAATGTGCACTTTATTTCTGCCTTCCAATGATTTGGATCCT  
CTGATACTCGGAAAGAGGCTGGGGCATGGGTGAAACTGAAAGACATTGTTTATTGGA  
TTAATTCAATTATTAGTTTATCCGATATCACTTTTCA

>GmGeBP4

ATGCACAACTGCCATAAACGAACAAACGGCTACCTTGACACTCTAATATGCGAAAAAAGG

AAATGTGATATCTCCTCAACAATGCTTTCCCGGTTGGTTTCTTGGATCTTGTGCCCCCTCC  
TCTTCTGAAGAAGAAGAAGAAATCCTTGACATCATCAAAGATAATGACATTAACCATGAA  
AACGACCAAAAAGTTCAACGTAGAAGATGACAAGAACGACCATTTTCTTAACTCATGCGAT  
GTGGACGACACCATTCCCATTTGCACTTGCCGTTCCCAATGCCTCCCCCGCCGTGACAGTG  
GCCTTCCCGGCCAATGACGAAAGAAACACCGTCCCAACCACCGCCACTGTGGCCACTATA  
GTAACACGCTCAAAAGGGCAGCGCAACGCCAAGTATCCGGAATGGTGAGACAATACCAA  
AGGCTGCGGACGAAGGAGGATGAGATGGAAGTGTGAAGGGATACCTTGATTACGTCAAG  
CAGCATAGAAAGGAAACCACCACCCTTCTTTACGTCGTAGTTTCATGTATGATCACGTAA  
GGCCCAAACTAAACATCGATTTCAACAGAAACCAGCTTGTGAGAACTGCGTAGGTAA  
AGAGAAAAACAAGTTGGCTTTGGAAAAAGGCAAGGACAAGGAGGTTCCCTTTAGGAACC  
CCCAGGAGCAGGCCATTTTTGAAATTTCCCAAGATTGGGCCAATGACACAGATAATA  
TAATAGTCCAAGATGCCTTGGATGGTGATGAATCAGGACACACTCCTGAAAGTCATGATC  
ATGTTGGCAACGTCAAGGTGAAGATTGAACAAGTTGACAACAGTGATGAAATAGGCAATA  
GAGTGCCAAAGCGGTTGCGGCTAGATGATGCAGACGATATGAACAGAACAAATGACCAGA  
ACAATGGTGATAGCATAAAGGCTTCATTGAGGACACCATGAGGTCCTGTTTCTACCAT  
TGCTGAAGGAAGTGTGGATGAAGCACAGGAAGAGTCACTTCCTGAGTTGGAGGCAATCC  
CAATGCCGCTATGCTCCGGGAAGTGGACCATGAACAATGGAGAAAACGGAGGATTTTGG  
AGTTGGAGGTGTATGTGAAGCGGTTGGAGTTGTTGCAGAATCAGATCAAGTCTAGATTGG  
AAGAGTTGCGATCTAGCTGA

>GmGeBP5

CCTATCACTCCTCTACCAGATTGTTTTTTTTTTGGTTATATATCCCAAGTCTGCTGT  
CACTACCCACTACCTAAGCTCTTCTCACTCACTCAGTTAGTTGTTCCGAAAACCCTAATT  
ATAATTAATTTAATTTACCATGGCACAGAAGCAAAAGCTGCGCCCTTCTCCTCTCGAC  
GAGCCACCCACTGCTTCTCTCCGATTCCGAGGAAGAAGAGCCACAACAACAACCA  
TCCTCCCAGAAGAACAAGAAGAGGAAGACGAAGAAGTTCTCTCCGAGAAGAAGAAGAA  
GAAGACGAAGAAGAAGAAGCTGCTTCTCCGAAGAAGAGGAAGAAGACGAAGATCTC  
CCACCACCACAGTTTCCAAAAACCCTCCACCCCTCCCGCAAACCCTCAGCCCCAACAC  
TCTTCTCCGAATCCGAAACCGAATCAGGATCCGAGACCGAATCCGAACCTGACCCCACT  
CCCGTCAAGGTCAAGCCTTTAGCTTCCAAGCCCATGGACCAGGCCAAAAGCCCAAGGCC  
CAGCCCTCCCCGGCGCCACCCCAAAATTGACACTCAAGCGCCCCGCGAGAACAACAAC  
AACAACGCCCGCGTCGCCACTCCAACGCGCCAAGAAGAAAGCCACCGAATCTTCTTCT  
GCCGCCAACTCCGCCGCGCCGCTGCTTCTGACGACGAGATGGAGGAGGACGGGAAGAAG  
TCCGGCGATAACTCGAAGAAGTTTCAGAGACTGTGGAGCGAGGAGGACGAGCTCGCCATT  
GTGAAGGGCGTGGTTGAGTTCACTTCGAAAACAGGGCTGGACCCTCTTAAGTTTCCCAAT  
ACCAACGCTTTTCACGATTTTCGTGAAGAAGTCGCTTCACGTGGAAGTTTCTTGCAACCAG  
CTGAAGGAGAAGGTCCGAAGGCTCAAGAAGAAGTTTGAGACCCAGGCTGGAAGGGAAG  
AACGGAGAGGCCCTAAGTTTTCCAAACCGCACGATCAGAAATCTTTGAATTGTCCAAA  
AAGGTTTGGGGACGTGAGGTTACTGCTGGAGCTAATGGGGGCCCCGTGGAGAAGCCCAAG  
TCTAATGGGAGTGCTGTCAAGAGTCCGAAGAAGAAGGAAAGCGGTAGCAGGAATGTGGCT  
TCTGCTAAGAAACCGAAGCCTGAATCAAAACCGAGCCGTTCCAGTGCTGTCCTTGGAG  
TATAAGGATTCTGAAAAGATGCAGATTAATCAAAAGCCTGATGGTGGTGATGCAAGTTTG  
TTTTTGCGCAATTGGCTCGATCCAAAGAGGGTGCGAGTATTTGTAAGCTGGATGAGGAT  
GATGTGAAGAGGGGGTTGGAGTTGATTGGAGAGTCAAAGAGGGCAGAGTTGAGGGGGAAG  
TGGAAGAAATTACATCTTGCTGAGATGGAAGTGTTCGAATCGCTCAGAACTGATAGGG

GAGCAGACTAAGTTGATACTTGAGGCGCTTCAGGCATCCGATCATTAGGATTTCTCAATT  
TTGTTAGGCGGCCTTTTTGGTACTCTGTGCCGTATATTTGTGACCTATCCTCTATGCAT  
TGTAATCATGTGGTTATGGTACGTACAGTCTTTTAATTCAGTGGCAGTAGCAGTGTTTAG  
TTATTGACTTTATGAAAATATCTTGCTTCAGAAGTTTCAAGGAATTTTGTTCAAATGAT  
TCTCTATAATTTATAACTTATTTTGAATTGGAACCTTTGTGGTGGTATAATCTTTTGGGT  
TTTTAGTCTACTTCACAAGTGATTGTTAATTGACTATGAGATATCTTATTTTTTTGTTGG  
TTGTGTC

>GmGeBP6

GTTGGCCTCTACTATATATATATATATTCCCAAGGCTTCTGTCACTACCTAATAATCTCT  
TCTGAATGTGCTCGTTGTTTAGAAAACCTAATCTGATTCAATTCAGCATGGCTCAAAA  
ACAAAAGCTGCGCCTTCTCCTCTGGACGAGCCACCCACCGCTTCTCTTCCGATTCCGA  
GGAAGAAGAGGAGCAACAACAACAACCATCCTCTCAGCAACACGAAGAAGAGGAAGA  
AGAAGTTTCTCCGAGAAGAAGAGGAAGCTTCTCCGAAGAAGAGGAAGACGAAAATCT  
CCCCCACCACCCATCTCCAAAAACCTCCACCCCTCTCCCTCAAACCTCAGCCCCA  
ACCCACTTCTCCGAATCCGAAACCGAATCGGGTTCGAAACCGAATCAGAACCCACCC  
CACTCCCGTTAAGGTCAAACCCCTAGCCTCCAAGCCCATGGACCAGGCCAAAAGCCCAA  
AGCTCAACCTCCCCGGCGCCGCCGCCGCAAAAATCGGCATCCAAGCGCCCCGCCGAGAA  
CAACAACAACAACGCCCGTGTGCGCGACCCCAAACGCGCGAAGAAAAAGCCACCGAATC  
TTCTTCTGCCGCCGCCATCTCCGACGACGAGATGGAGGAGGACGGGAAGAAGTCCGGCGA  
TAACCTGAAGAAGTTTCAGAGACTGTGGAGCGAGGAGGACGAACTCGCCATTCTGAAGGG  
CGTGGTTGAGTTCACATCGAAAACAGGGCTGGACCCTCTTAAGTTCCCCAATGCCAACGC  
TTTCCACGATTTTCATGAAGAAGTCGCTTCACGTGGAATTTCCAGCAACCAGCTGAAGGA  
GAAGCTCCGAAGGCTCAAGAAGAAGTTTGAGACCCAGGCAGGAAAAGGGAAGAATGGAGA  
TGCCCCTAAGTTTCCAAACCGCAGCATCAGAAATTCTTTGAATTGTCCAAAAAGGCTTG  
GGGAAGTGAGGATGGTGGTGTAGCCAATGGCTCCGTGGAGAAGCCCAAGTCCAATGGGAA  
TGCTGCCAAGAGTCCGAATCCGAAGAAGAAGGAATCCGGTAGCAGGAATGTGGCTTCTGC  
TAAGAAACCGAAGCTGAAACAAATCCGAGCCGGCGCCGGTGCCGTCCTTGAGTTTAA  
GGAGTCTGAAAGGATGGAGATTGATCAAAAGCCTGATGGTGGTATGCATGTTTGTTTTT  
GCGCGAATTGGTTCGATACAAAGAGGGTGCCAATGTTTCTAGGCTGGATGAGGATGATGT  
GAAGAGGGGGTTGGAGTTGATTGAGGAATCAAAGAGGGCAGAGTTGAGGGGGAAGTGGA  
GAAATTACATCATGCTGAGATGGAATGTTTGCGAATCGCTCAGAACTGATTGGGGAGCA  
GACTAAGTTGATACTCGAGGCGCTTCGGTCATCCAATCATTAGGATTCTCAATTTTGT  
GGCGGCCTTTTCGGTACTCTGGCCATATATTTGTGATCTATCCTCTATGCATTGTAAC  
CTTGTTGGTTATGGTATAGTCTTTTAATTCAGTAGCAGTAGCAGTGTTTAGTTATTGACAT  
TGTCAAAAATATCTTGCTTCAGAAGTTCCTAGGAATTTTGTGACAAATGTTTCTCTATAAT  
TTATAATTTATTTGGAATTGGAACCTTTGTGGTAGTATACCTTTTGGGTTTTATTCTA  
CTTCACAAGTGATTGGTAGTAATATCTTACTTAGGTATCTAATTTATTAGTTAAATGATT  
TGTTGTCCTTCTTGTATTTATTTCTTTTCGACCATTATGGTGATCATTGTTTCATTGTA  
CATCAAGGAATTTTAGTTTGAAGGATTCATATTTTGGTTATTTTGTGATTACATCCAAT  
GATGTATGTGATATGGGAATTGGTGTGGTCACTGAGATGGTAGTTAATTTCCCCTATCAT  
GAAGTCTGATCATTTCTAAATTACATTTGATGGCCAAGGAAAATCCTCATTTTGTGAGAA  
TGCTTTGATCAATGTGAGAATCTTGT

>GmGeBP7

TGGTCCACTAGGCTTACCTAAACCAAAACCAAAACCACCTTCGGATTCCCATTACCAGC

AGCGAAGTGAGTGAGTCAGTCCAACTATAACCGAAAACCCGTGACTCAGCCCCACTTTTG  
CTTTGCTTGGCCTAACCTAACCCTAACCCTCTCAAGTCTCAATGGCTTCTCAGCA  
ACACGACGCCGTTTTCCGCGAAGAAGACATGGACGACGACGACGAGTCTCAGGAGGA  
CGGAGACTACGAAGAAGAAGACGACGACGTTTTGGCCGACGACGAAGAAAACGAGCCCTC  
TCCCTCCACGGCTCTTGCCGTACCGTCGCCGTCCCCGGTTCTCCGTCTCCAACGGCGG  
TGCCGTCCAATTTGACGCCCCACCGCCACCACCATCGTCGTCGAGACTCCTCCGATCC  
GAAGCGGGCGCCCTCGAGCCAGTCGAGGAGAAAAAGCCGCCCGGACGCCGACGACTC  
GCGGCGGTGTTTTAGCGGCTGTGGACCGACGAGGACGAGATCGAGCTCTTGCAAGGCTT  
CCTAGACTACACCTCGCAGCGAGGATCCTCGCACCACAACGACACGGCTTTGTTCTACGA  
CCAAATCAAGTCGAAGCTCCAACCTCGATTTCAACAAGAACCAGCTCGTCGAGAAGATCCG  
AAGGCTGAAGAAGAAGTACCGAAACGTCCTCAACAAGATTGGCTCCGGAAGGAATTCTC  
CTTCAAGAGCGCTCAGATCAAGCCACCTTCGAAATCTCGCGCAAGATCTGGAGCAACGT  
GACTCCAATCGGCGACAATTCCTTGACGACGACGAAATCAACCCTAACCGTAGCCCCAA  
CCCTAACCTTAATTTAGCCCTATAATTCTTAAGAATGAAATGATTTTCAGGAACCCCGC  
GGAGAAGAAAACACCGAAACGCTCTCGGCCACGATCGGCGGTGAAAATCGAGCCAAATGA  
CGGATCCGCGTCGAACAGAGATCATGATTGTATTAGCAATGCTACGCCTACTGCTACTGC  
TACTGCTGCTGCTACTAACAATACTCTACTGCAGCTACTACTAATGATAACTGTAACAG  
TGGTTATGGAATAACATACCGAGTATGATCGAGGAGACGGTGAGGAGTTGTTTGTGCC  
GGTGTGAAGGAGTTGATGGCAGGGGCCATGGGAGGAGGAGCGTTTGGAGCGAGAGGGTT  
TTCGTTGAACTTGAAACCCTATGCCTTTGATGAATTGGAGTTTGGCGGTGGGAAATGGT  
GGATGAGAAATGGAGGAAACAACAGATATTGGAGTTGGAAGTGTACTCAAAGCGGTTGGA  
GCTGGTTCAGGATCAGATCAAGGCTGCTATGGAGGAGTTGCGGTCACACGGAGGAGTTG  
ATCAATCTTTTAGTTTGTGTTTGGTTTTGTAGTGAGTGATTGGAGTTCTTCTCTCTT  
CATCATCAATGGTTGGTTTCTTCTCATAGCTTAGTGGTTAGCTAGTAGTAAGTAGTAAGT  
GGTAACTAGTGTGTTTCTTTTCGATTTTAGCTTTGCTGATTCGGTGGAGCACTTGTCTT  
TTAAATAAAATGTTTTTAGTACATTTAGCCGTTTTATGTTCTCTAAATTTCAATG  
GTCTCATAATGTACAGAACAGATTGAAGTAACTGGTGCGGAGTGATGGCTTTGTACCAT  
TATATATGTTGTAAGATGCGAAAGTAGTGAGTTCTTAATTGTGCAACATTCTTCCCGA  
GTACTTTGCTCTTAAAGTTTCATGCAGTATTCTGTGTCTTCGGGGTTCTTGCTATATC  
TTTCGTATTTTATGATTCAATGGATTGTAAAGATGGCATTCTTAATCTGAAAGAGATT  
CTGCGATGTTCTGTGTCAATTGTTGAATAACGAAACAATGAATGCTGTAAACCAGGGGT  
GTTGAAGAACCCTCGATATTCATATATGCTGCAAGTGATTGGGGCTGAAGCTCTTGA  
ATTTTGAATGC

>GmGeBP8

GAAATGTGGTATCTCCTCAACAATGCTTTCCCCGTTGGTTTCTTGATCTTGTCTCCCTC  
CTCTTCCTCCTCTTCCGAAGAAGAAGAAGAGATCCTTGACATTATCACAGATAA  
TGACATTAACCATGAAAATGACCAAAGCTCAATGTAGAAGATGACGAGTGTGATGTGGA  
CAACACCATTTCCCGTTGCACTTGCTGTTCCCAATGCCTCCCCCGCGTGACAGTGGCCTT  
CCCGGCCAATGACGAAAGAAACACCATCCCAGTCACCGCCACTGCCACCACTGTCGTAAC  
ATGCTCAAAAGGGCAGCGCAACGCCAAGTATTCCGGAATGGTGAGACAATACCAAAGGCT  
GTGGACGAAGGAGATGAGATGGAAGTGTGAAGGGATACCTTGATTACGTCAAGCGGCA  
TAGAAAGGAAACCACCACCCTCCAAAGCGTCGTAGCCTCGTTGTATGATCACGTAAGGCC  
CAAACCTGAACGTGAGTTTCAACAAAAATCAGCTTGTGAGAACTGCGTAGGTTAAAGAG  
AAAACACAAGTTAGCTTTGGACAAAGACAAGGACAAGGAGGTTCCCTTTAGAAACCCCA

GGAGCAGGCCATTTTGAATTTCCACAAAGATTTGGGGCATTGACACGGATAATATAAT  
AGACCAAGATGCCTTGGATGGTTATGAATCAGGACACACTCCTGAAAGTCATGATCATGT  
TGGCAACATCAAGGTGAAGATTGAACAACCTTGACAACAATGATGAAATAGATAATAGAGT  
GCCAAAGCGGTTGCGGCTAGATGATGCAGATGATGTGAACAAAACAAATGACCAAAACAA  
TGGTGATAGCATACAAGGCTTCATTGAGGAGACCATGAGGTCATGTTTCCCACCATTGCT  
GAAGGAAGTGGTGCATGATGCACATGAAGAGCCACTTCCTGAGTTGGAGCCAATCCCAAT  
GCCACTATGCCCTGGGGAAGTGGACCATGAACAATGGAGAAAACGGAGGATTTTGGAGTT  
GGAGGTGTATGTGAAGCGGTTGGAGTTGTTGCAGGATCAGATCAAGTCTAGATTGGAAGA  
GTTGCGATCTAACTGAGGATGACATAAGTTTATATTGCTCCCAATTGTGCAGAAACATC  
ATGTGCCTTATTCTACACTAACAATTGCAATGAATAGTAGAATAGCTCTAGCAATTCTGT  
AATGTTTTGTAGTAGACAAGAAATT

>GmGeBP9

ATTCTTATTGCCAGCGAGTGAGTCAAAAGAGACACTAACAAAACAAACCCCGTGAAAGCA  
AAGCACCCACCGCGCTCTTTGCCTAACCGACTCACTCCCATGGAATCCGATCTAAACGA  
CGCCGTTTTTCCCGAAGAAGATCTCGACGACGACGACGAACTCCAGAGGATGAAGAGGA  
GGAGGAGGACGACGACGTCTTAGATGACGATGAAACCGAACCCCTCCCTCCGTCATCGC  
CGTCGCGCGCCCGCTTCCGAAACGCTCGACACCGCGTTAATTCCGATCTCCTCCGTCGC  
GGATTCTCGCGAAACCGCTGCGCACGGAGCTAATCGAGGAGAAAAAGCGCTGGACGA  
TTCGCGGCGACTGTTCCAGCGTCTGTGGACAGACGAGGACGAGATCGGGCTCTTGCAGGG  
TTTTCTGGAGTACACGGCGCAGCGAGGATCCTCTCACCACAACGACACCGCCCTGTTCTA  
CGACCAATCAAGTCGAAGCTCCAACCTCGGCTTCAACAAGAACCAGCTCGTCGAGAAGCT  
CCGAAGGCTGAAGAAGAAGTACCGCAACGTCCTCAACAAAATCAGCTCCGGCAAGGAAGT  
CTCTTTCAAGAGCCCTCACGACCGAGCCACCTTCGAAATCTCGCGCAGGATCTGGAGCAA  
CACCGCTCCAATCACCGGTCCCGTCGAAGACGACGACGAAATCATCTAACCCTAATTT  
CGGCAATTCGGCGAAGATGCCTATTTGCGGGAAGCGGTGCGGCCTCAGAAGCGCGAGTT  
GAACGACGGTTCAACGTTGAATAGAGATAATAATTGCAATAGTAACAGTAATAATAATA  
TAATAATGAGAATTGTAATAGTAGGCTTAACCTACAGGGTTTGATTGAAGAGACGGTGAG  
GAGTTGCGTGTGCGCGGTGTTGAAGGAGTTGGCGTGTGGTACTGGTGGCATGGGATTGGG  
AAGAGGGTTGCGATTGAATCCCTTGCAAATGCCAATGCCAATGAGTTTAATGAATTTGGG  
GATTGTTGGGGAACGGCGATGGATGAGAAGTGGAGGAAGCAACAGATTCTGGAGCTGGA  
AGTGTATTCCAAACGTTTGGAATTGGTGCAGAATGAGATCAAGGTTGCTCTCGAGGAATT  
GCGTTCAGCTGGTGGAGGATGACCCAAAATAAACTAAGCTTTTAGGTGTTTACAGTACT  
TCATAAGGATTTGCTTGCTAATTTATTGATCCACTAATGGTTGATAGGGTAGCTAGACAG  
TTTGTATTTTTTCCCTTTTTTCTATAGTTTAGCTTTTCTTCTTTTTTGCTTTTC  
AGTATAGCTTTTGATTATTGCAACAGTATTTGTTCAATAAAATGTTCTTATTTTTGTCT  
TTTTGGCTTATGTAAATTTTCTTCTTGGCTGATTAATAATTTACATGTACATGTACAGA  
TTAAGTCAGGGAATTGGCGTAAGATGAAAGGCCTTGATTTTTGATGTATTGTAAAGTATG  
AAATTGTCAATTGTGGGTGAATTTCTTTTCG
