# Supplementary material for: Genome-Wide Characterization and Expression Analysis of GeBP Family Genes in Soybean
Source: MDPI journal article supplement (doi:10.3390/plants11141848), 2022-07-14
Supplement: s1 [file s1]

>GmGeBP1

MASEQHDAVFREEDMDDDDDESQEDEEYEEDDDEENVSPSTALAVTVAVPGSAVSNNGG  
GSPISKPTATATTATIVLADSSDPKRRRLELIEKKPPPPLDDSRRLFQRLWDEDEIEL  
LQGFLDYTSQRGSSHHNDTALFYDQIKSKLQLDFNKNQLVEKIRRLKKKYRNVLNKICSG  
KEFSFKSAHDQATFEISRKIWSNVTPVGDNSLDDDEINPSRSPNPNLNFSPVILKNETIF  
RNSTEKKTPKRSRPSAVKIEPNDGSASNRDHNCISNTTPTATAAATNTAAAAAGTNNN  
NCNSGYGNNIPSLIEETVKSCLSPVLKELMAGAMGGGAFGGRGFSLNLPMPFMNLSFGG  
GEMVDEKWRKQQILELEVYSKRLELVQDQIKAAMEELRSHGGGGL

>GmGeBP2

MMSSDRITLKGPPLLFSFPGEVGRFYLVSAFLHQQLPPIEASSDEEQRPSKQHTEE  
GVSSSEEASSQEEDDDQPPTPLASANPHPKPSSSDSDTDFEPTKVKPKPTDQAQKPQP  
SPAPPKWGSKRPAQNNAPATDPKRAKKKLTNSSSAAAAHETEEKSGGGQAKLSQRLFSKE  
DELA ILKGMAEFISKTGDPYKYADAFQNFVKNLSRVEASSNQIKEKIRRLKKKFETKAQ  
RAKKWEDPEFSKFHDRTVFELSKKVWEGANGLVEKPKPNNGKRKTAKTPKKDATSRNVV  
AKSETTTLLESMELEECGNVNLLYREVS GFKELNEDEMKRGLALIGESKRKELEGKWRKL  
RLAEMELVANRSL LIGEQIKLIFEALQ

>GmGeBP3

MESDLNDAVFPEEDLDDDDDETPEDEEDYDDETEPPPFVLAVVAVAPPASTASETLDTT  
LIPISAVADSSLKPLHPELIEEKKALDDSRRLFQRLWDEDEIGLLQGFLDYTAQRGSSH  
HSDTALFYDQIKSKLQLGFNKNQLVEKLRLRLKKKYRNVVTKISSGKDV SFKSPHDKATFE  
ISRRIWSNTAPISGPVEDDDEINPNPNFGNSAKTPI SRKRSRPQKRELNDGSTLNRDNNC  
IGNNNNSNSNNNNNENCNGRHLQGLIEETVKSCVSPVLKELVCGTGGMELGRGFGVGG  
GLGVGGGLALNSLQTMTPMTLLNLRIGETTMDEKWRKQQILELEVYSKRLELVQDEIK  
VALEELRSAGGV

>GmGeBP4

MHNCHKRTNGYLDTLICEKRKCDISSTMLSRLVSWILSPSSSEEEEEILDI IKDNDINHE  
NDQKFNVEDDKNDHFLNSCDVDDTIPIALAVPNASPAVTVAFPANDERN TVPTTATVATI  
VTRSKGQRNAKYSGMVRQYQRLRTKEDEMELLKGYLDYVKQHRKETTTLLYVVVSCMITN  
QLVEKLRLRLKRKHLALEKGKDKVEPFRNPQEQAIFEISHKIWANDTDNIIVQDALDGDE  
SGHTPESH DHVGNVKV KIEQVDNSDEIGNRVPKRLRLDDADDMNRTNDQNGDSIQGFIE  
DTMRSCFSPLLKEVLDEAQEESLPELEAIPMPLCSGEVDHEQWRKRRILELEVYVKRLEL  
LQNQIKSRLEELRSS

>GmGeBP5

MAQKQKL RPSPLDEPPTASSSDSEEEEPQQQPSSQKNKEEEDVEVSSGEEEEDEEEEEE  
AASSEEEEEDEDLPPPPVSKNPPPPANPQPQHSSSESETESGSETESEPDPTPVKVKPL  
ASKPMDQAQKPKAQPSAPPKLT LKRP AENNNNNARVADSKRAKKKATESSSAANSAAA  
AASDDEMEEDGKKS GDN SKKFQRLWSEDELAIVKGVVEFTSKTGLDPLKFPNTNAFHDF  
VKKSLHVEVSCNQLKEKVRRLKKKFETQAGKGNGEAPKFSKPHDQKFFELSKKVWGREV  
TAGANGGPVEKPKSNGSAVKS PKKKESGSRNVASAKKPKPESKPEPVVLSLEYKDSEKM  
QINQKPDGGDASLFLRELARSKEGASICKLEDDVKRGL ELIGESKRAELRGKWKKLHLA  
EMELFANRSELIGE QTKLILEALQASDH

>GmGeBP6

MAQKQKL RPSPLDEPPTASSSDSEEEEPQQQPSSQQHEEEEEEVSSGEEEEASSEEEE  
DENLPPPPISKNPPPPPSNPQPQTSSSESETESGSETESEPHPTPVKVKPLASKPMDQA

QKPKAQSPAPPPPKSASKRPAENNNNNARVADPKRAKKKATESSSAAAI SDDMEEDGK  
KSGDNSKKFQRLWSEEDELAILKGVVEFTSKTGLDPLKFPNANAFHDFMKKSLHVEFSSN  
QLKEKLRLRLKKKFETQAGKGKNGDAPKFSKPHDQKFFELSKKAWGSEDGGVANGSVEKPK  
SNGNAAKSPNPKKESGSRNVASAKKPKPETNPEPAPVPSLEFKESERMEIDQKPDGGDA  
CLFLRELVRVYKEGANVSRLDEDDVKRGLELIEESKRAELRGKWKKLHHAEMELFANRSEL  
IGEQTKLILEALRSSNH

>GmGeBP7

MASQQHDAVFREEDMDDDDDESQEDGDYEEEDDDVLADDEENEPSPSTALAVTVAVPGSS  
VSNGGAAPISTPTATTIVVADSSDPKRRRLEPVEEKPPPTPDDSRRLFQRLWDEDEIE  
LLQGFLDYTSQRGSSHHNDTALFYDQIKSKLQLDFNKNQLVEKIRRLKKKYRNVLNKIGS  
GKEFSFKSAHDQATFEISRKIWSNVTPIGDNSLDDDEINPNRSPNPNLNFSPILKNEMI  
FRNPAEKKTPKRSRPRSAVKIEPNDGSAASNRDHCISNATPTATATAAANTTTPTAATTN  
DNCNSGYGNNIPSMIEETVRSCSPVLKELMAGAMGGGAFGARGFSLNLPMLMNWSFG  
GGEMVDEKWRKQQILELEVYSKRLELVQDQIKAAMEELRSHGGG

>GmGeBP8

MLSPLVSWILSPSSSSSSSEEEEEI LDIITDNDINHENDQKLNVEDDECDVDNTIPVAL  
AVPNASPAVTVAFPANDERNITPVATATTVVTC SKGQRNAKYSGMVRQYQRLWTKEDEM  
ELLKG YLDYVKRHRKETTTLQSVVASLYDHVRPKLNV SFNKNQLVEKLRLRLKRKHLALD  
KDKDKEVPFRNPQEQAIFEISHKIWGIDTDNIIDQDALDGYESGHTPESH DHVGNIKVKI  
EQLDNND EIDNRVPKRLRLDDADDVNKTNDQNGDSIQGFIEETMRSCFPPLLKEVLHDA  
HEEPLPELEPIPMPLCPGEVDHEQWRKRRIILELEVYVKRLELLQDQIKSRLEELRSN

>GmGeBP9

MESDLNDAVFPEEDLDDDDDETPEDEEEEEDDDVLDDDETEPPPSVIAVAPPASELDTAL  
IPISSVADSSPKPLRTELIEEKKALDDSRRLFQRLWDEDEIGLLQGFL EYTAQRGSSHH  
NDTALFYDQIKSKLQLGFNKNQLVEKLRLRLKKKYRNVLNKISSGKEVSFKSPHDRATFEI  
SRRIWSNTAPITGPVEDDDEIITNPNFGNSAKMPI SRKRSRPQKRELNDGSTLNRDNNCN  
SNSNNNNNNENCNSRLNLQGLIEETVRSCVSPVLKELACGTGGMGLGRGFALNPLQMPMP  
MSLMNLGIVGETAMDEKWRKQQILELEVYSKRLELVQNEIKVALEELRSAGGG

>MtGeBP01

MLSPLVSWILSTSSSSSSSEEEEEESLDINNDSDNEKFDNDNVEDQMDNVDDDEKDH  
LCPVNVEDQMDNIPIALAVSDASPVVTVAMAAPADDTNAATNTATTSATTTITTRSKRQ  
YNKKYSDGVKQYQRLWTKQDEIELLKG YLDYIKQQGRANTTIQSGVASFYDQVIPKFSVE  
FNRNQLVEKLRLRLKRKHMTLDKGKEVQISFKIPQEQAIFEISHKIWGNDTDHVDLVDV  
SRPVPEPDLIENIKLKAEDVDNCEETDKRAHKRVRLTTDDVNSKNYQSNSDATSLRGFI  
EETMKSCFSPLLKELLDDVPVEPPGALPMLLSTGEVRDEKWLKRRILELEVYLNRLLELLQ  
GQIKARLEELKSSLD

>MtGeBP02

MSTFATAAIPTTIILALPNTAATANVNEDEITILQGFLDYNNRGSSYHNDIGSFYDQI  
KFRRLKKNHCMVLHKFDGKDFAFKRAHYQATFEISHKI

>MtGeBP03

MAFSRNGVVIPTHDEHADIEEEDDDLEEDNYFVQPNTDHHYQTEQSPSTFATAAVPTS  
VILALPHASASATTIDGSPEPKREPMEEKTSDSRKLFQRIWTEEDEITILQGFLDYNANR  
ESSYHNDTGSFYDHMKGIQLDFTKSQLVDKLRRLKKKYRTALQKFD SGKDFGFKSTHDQ  
AAFEISHKIWNINGNSTPIGPVEEDDEIIPNPNPNSSHLAEKKAVQSRKRSRAAEERH

ELNDSKDNHQNNSGNTNSSNVNENREKSNGNHVHNVPGLIEETVKSCLTPVLKELSNATM  
SGSPFGGGRGFGAGGFSMNTVPLGFLNLGSGEKAVDDKWRKQQILELEVYSKRLELVQD  
EVKAAIEELRSNAGAGGAGGSGNNTNQ

>MtGeBP04

MAPKPKKRLALVDDPPTASSSDEEQPPSTQKPADKVVNEQDEDSSEEEEGDEEDGSSSE  
DEEEDNQTTQTPSKDSKPASKNPPSTPISNPKPAESESSESSESGETSDSEPEHKS  
EPTPPNPVKVPLASKPMKTQTQAQAQSTPVPIKSGTKRVAESSTGNDSKRSKKKTTTAG  
GGSDDENEEEDAKLTGEDSKNFQRVFSEEDLVILKGLGDFVAKTGKDPMKETA AFHS  
FVKLLKADANAEQLKRKVRGLKKKFESSDNFTKPHDKRAFDLFKVWSKNASKEAEENGK  
SNEKIAKSAKKEAPVKNGGSAKKELAIVTKNVSGKVESGVGKSFILSELVKFDEAAGIAV  
LDKDAAESGLELMRESRDRVEERWKKLQAAEMDVFLNRAEVVREQTRLAMQELKKKSST

>MtGeBP05

MAKNSATAAVKDDPPPQEDKIEQHDENDEETSSEAGSSSEGEEEEESSEEEAPKTTPP  
PKTNPKNNSVEDEDEEETDDEDEPPPKTKPIEQTLKSGTKPSIAPARSGTKRPAENNDT  
KQSNKKKTTEEKNKKKEKEPEEDDNSNNKASFQRVFTEDEVAIILQGLVDFTAKSGNDP  
TKHLSAFYQIVKKS VHFVTL DQLRDKVRRRLRLKYENKIKSKKTPTFSKPVEETMFELSK  
KIWGGGKVDVNEGEENEKVNGKPAKKELAVKAAAARTTKKLVMEPDSPLVVLKVDSGNG  
KEDTGLSLVSNETHFEPVIDVVKRGVESIEESKRGELERLMNKYKIAEMELFMQKTELA  
KETATKIRDALNSSSSH

>MtGeBP06

MASQQHDTVFPPEEDIDDEDEFHEYEEDEEDDDVLVDDEENDLPSASASISVPSVTAV  
PGGALRPPILPTATTIIFADSTFSSDSKRQRLDQIEKKPLLED SRKLFQRLWDEDE  
MELLQGFLDYTTQRGSSHNDTAQFYDQIKSKLQLDFNKNQLVEKIRRLKKKYRNVVSKM  
SSGKEFVFKTAHDQATFEISRKIWNNAPIAGDIAIDDEINLNPISNPNLNFPTPVILKS  
EVNSTTRKRSRPRSVSIRSEKRESNDAVASNRDRDYLINLNNPNPNPYPNHNHHPNPN  
PNAYTTTATVNPATPTITTPNVNTNAAIHANNYSNNCSTAGNVAGVIEETVRSCLSPF  
KELMAGAMGGGLFASRGSFAMNPLPFQMMNLGFGGGELADEKWRKQQILELEVYSKRLEL  
VQDQIKTSLDELRSVGGSSQL

>AtGeBP01

MSRRFNPLEDPPSASSSDEEGKEIARNSSSDEDDVSSENPSPLKTTLDVSDSESGSDE  
ETDSDSELEKKKQVVTNPVDVKRAKKVKTSEKSGAKRSLEVDEAAVSM DVKRAKKVSGE  
EEKKKSGGGGEETKKT YFQRLWTEDEIVVLQGLIDDKKDTGVSNTNKVYELVKKISFD  
VSKNQLMEKLRALKKKYENNLGKAKDGVPTFVKPHDRKAFELSKLVWGGIRMALASGMK  
SNEKSKKSSKFESVKHELDSSLPNSKNNCEVMDGEVVSFTKSSLVRSIVGLMDELTA  
QQGLSKLASKDMKRFYEQWKAMQAREFEFFLQKHGFLFEVLSKISEAFGSNA

>AtGeBP02

MNKKLLNPLEDPPTASSSEDVDEEISSGEDEKEHISNSSSSEENELKDLSTQTLNSPST  
EAPTLDGSETNSDSKPIVLTSQKKKEGTDSSGTRASEGTSSKDIKRAKKVSGDDDNK  
KFQSLWTKEDEISLLQG MIDFKAETG TSAHDDMNGFFDIAKRYISFDVSKIQFGDKIRGL  
KKKYFGVRKKKGLDLHDHKKCLGLAKSIWGLDGKEVVVLGGDSETS NWFESFLVRVVAR  
LGVDECIVKWKSVSKETKKRIEEKMKMVEAKELELLSQKIDVLKEVASVIAETI

>AtGeBP03

MKRITKLLASHSLKSLMAKKNKRSQQKNKCLKPEKDPSTVKRLLEDPPRKKRYLQPLENP  
PTESYGDDEKMETEEEGEKYLGKNLPASAFIIVAAERHSDSYSETELEKKICGSVVVAK

MNDDKMVSTDTKKKYFQRILSDDDKIVLLQGMVDFQNDKGTISYDDMTGFIDTVKNIISF  
QANSRQFTTKIRRLKDKFVQKRNGVDENSLANVEIYEI

>AtGeBP04

MTKKLNPLEDPPTATSSDEDDVETSEAGEASDDSSSSEEDVPIKIRIKSPSATTAAAPPA  
KSTAVSTAADSDSGSETETDSDSESTNPPNSGSGKTIALNTVNLKKKEDPTSSSATLALP  
AMKSGTKRPASEAAATTSTKRVKKDEESVKKPGGFQRLWSEDEILVLQGMIDFKADTGK  
SPYVDTNAFYDFLKKSISFEVSKNQFMDKIRSLRKKYIGKEGRNEPSFVKAHDKKAFELS  
KFIWGPKGIALDSNVKSNVSKSVAKKKIDSVKQELVFAGGSSTNGKKVEEDGGDDGCD  
WFDNSSLVRMIASLGVDEYYVKKQWSLVSVESKKIVEEKYKLLQAKELEFVLEKTKFLNE  
VASMFEASKNKPLDT

>AtGeBP05

MSKKHLKPLETCFEDEEDDVIYLPPLVTGATSKKNEEF CGSGSKVQPSEMRRSEGTST  
DMTSKRAKKVSAEDEKKVGEWTKNPYFQRLWSEDEIVMLQGI IKFEDVTGKSPFEDRHG  
FIEFVKNSISFEASVQQYIGKISQLKRKYTRKRKNGFSEGHEQKCFKLAMSIWGTKETSK  
KTDLCSSPKGKKVKEEDGDVTNSDFENSFLLPSIESLGVDSVKKRKNVVPMEFKKKIEE  
RLELLEADESECKMEEMLKVKNSECVKQKTNLLNEVIDVMT

>AtGeBP06

MKGITKKLLVSRSLKRLTAKNRRKIHRETNRKLKPEEDPSMVKRRQDSDSDSLEKEVSV  
VVTKTSDDDEMVSTDTKKNYFQRIWSDDDEIVLLQGMVDFENDKGKSPYDDMTGFIDTVKN  
FISFQANQHQFTTKIRRLKDKFLKKWNGVDENSLVNAHDRKCFQLSKVIWEPTTKVEEV  
GDWFVNSYLVGSIARLGVSEDMKQSWSMVPIETKKEVEEKFKLLKDEESENRLKTSFL  
QKVNSMIIEATN

>AtGeBP07

MSHKRFNPLTASSDEDELETPIREVEDSSSDEETDSDSDSELGKKDEVVTEVSALNNQE  
SKSVKISEKSVAKRSRETHEAQASADVKKAKKVKKRGGGGGEEAETKKAYFQRVWTDDE  
IVVLEGFIDYKNDSG

>AtGeBP08

MVTPKQIDFSSCGGDNSSDTLSHRESRNPSSKRAAASF AAEEAGEETMKKKKKKKKKNL  
GPPLIVRIWNEEDEL SILKGLVDYRAKTGFNP KIDWDAFYSLGSSIVAKFSKEQVLSKI  
RKLKRRFHVHWEKISEGNDPKFTRSSDSEAFGFSSMIWGQGEFGNDDGMDKEMVKEHDVN  
GNGAAENG TARIAQENESGEEMLKEHEETLNENGAE EIRDND ETARKAQQLESESEEEML  
KEHEEPFNENGAENIRDNNGTTQIAQQSESESEEMLKEHEEVANTEL VNENGA AKTTENG  
TTGKERHDDDDDELCAVQDAFEAVMSQGLSGYQKKLQLEKLMNLGTGKRRELSDEWKA  
LCVEERRLNIKKLRFSAKLAE AANDS

>AtGeBP09

MVGTKRVADSIDTNSDDTLTRNREVEVEAMLSRRKQLRTTTTTRTTTTPSLSSSASK  
MNWSKNDELVILGGIVDYENETKLSYRSWDALYRIKDCVEAKFSKIQLINKVKNMKRK  
FTYNQGRSNHGEQLSFTNTDDDEIFKLSLI IWDKNESEYVSNENIDQAKDVPSGEPETND  
VPCEEQDDRDVPCEEQERANIEIDNGVREKLDQAKDVPCVEQESDVPCEQERVSIEID  
NGEKEKLDQTMDCEEQENTDVLCEEKGDKDVPCEEQENKDVPCEEQERVSIEIDNGEEEM  
SSEEDGVDEVGMEDTLDSGISFQGLGKNGVKDKSEEDDVVELGVLQEIFKEDTFFQSLG  
RYQQKLLQLNLENGVERRKELINEWKALFVDEQRLCVKKLTFAAKLANLGVSP

>AtGeBP10

MTSDHRDALFSLELESPDPDEGGVADGGESDTDEDLRDNDVVMPTNEAEAEDDDPEEE

DLNSPSTSSSLPMVSTISATAVVS GTPTATSSSTGAVTVALPAGSAVPVSVIPVDSDPKWHR  
MTEIVHQRPPIDDSRRLFQRLWDEDEIELLRGFLDYMTMHRGSSSHPPDTAPFYEQIKS  
KLQLDFNKNQLVEKLRLRKKKYRNVMSKISSGKEVFFKSPHDQSTFEISRKIWNQTGKII  
GFEDNNVMDFEETNNHHNTTNGNYSTFNSPSSNPTLELDSENGIEKKLTMSSSSVSRKRS  
RSRIGKIEEDNKPVITPSDGPIASNVNLNEAAAVGIGGNLGGLEETVKNCVSPVIKEMM  
NGTTSMMMAAMGGGFPGLGGGGGGGGHGFGLSPMFTRPFNFGFGVEGGGNKAVADERW  
RKQQILELEVYSRRLELVQEQIRTTLNELKTMPSGI

>AtGeBP11

MTSDHRDALFSLELESPDPDEGGVADGGESDTDEDLRDNDVVMPTNEAEAEDDDPEEE  
DLNSPSTSSSLPMVSTISATAVVS GTPTATSSSTGAVTVALPAGSAVPVSVIPVDSDPKWHR  
MTEIVHQRPPIDDSRRLFQRLWDEDEIELLRGFLDYMTMHRGSSSHPPDTAPFYEQIKS  
KLQLDFNKNQLVEKLRLRKKKYRNVMSKISSGKEVFFKSPHDQSTFEISRKIWNQTGKII  
GFEDNNVMDFEETNNHHNTTNGNYSTFNSPSSNPTLELDSENGIEKKLTMSSSSVSRKRS  
RSRIGKIEEDNKPVITPSDGPIASNVNLNEAAAVGIGGNLGGLEETVKNCVSPVIKEMM  
NGTTSMMMAAMGGGFPGLGGGGGGGGGGFVYNLLY

>AtGeBP12

MMRLRRLRLRRCFRDCSVRLTKSLCFKKLIEFDATKNQIVTKLQRLKKKFNNAVKN  
ARKKGQTEDEVEYAKESEKKRFDLSIMIWGSGVLVAGKSSKKKVAPKEMKPEETDAKVV  
NEGLSIGREMPFGSSCGLDESKLTTGWENVEDGAEKREVEEKWKKFKDKLFELLYERSV  
LMNKTEAMMFKAES

>AtGeBP13

MDKANTNRSKVCGGSGEAKLTGKKRKNVSAKQSKKDAKKENSQMLKWSSKDEVVLQGML  
DFKSVTGKNPVDDINGAYEFVVEYISTVIDEDFIEKMKSLKKLKKKQRIYDKDPSSSE  
PLYQKSSEWLKMIWGYDVSALEKPRKSKRIIKL

>AtGeBP14

MASLENPAIDSSSEFESSSEEISSSKESKPKEAPVTVPSTKTLNPSAAVAVSDDSESEK  
QSFVLTRRRKKKEGAAESPAVKSGKKEGAAESPAVKSGNNEGATESPAVKSGKKRASEGTT  
SRDMHVKRIKKEGDNKKGHAQRVWSEDEISLLQAMIDFKAETGTSPWDHKDRFFDIAKK  
SISFDVSKVQFFDKIRSFKRKYFGDRKVRVESDHDKKCLGLAVSFWGSDGVSLPTPVKK  
KVKDESVLVKANSKEKNVKPLVKEDEQVVLGEDSEWFEEFSLVPVIAISLGLDEYSVKKK  
WSKVSVETKKRIQEKMKLVDAKKCELLLANMDVLKEVTSVLTQTN

>AtGeBP15

MAPLESPATASSSEVESSEEIFKSSSEESKPKDPVTVPSSKTLKSPSAAVNSKTDSSDD  
SEKQSFVLTRRRKKKEGAAESPAVKSGKKRAGEGSTSRDMHVKRVKKEDDNKKANPQVRWS  
EEDEISLLQAVIDFKAETGTSPWDHKNAFFDIAKKSISFDVSHVQFFDKIRRLKNKYFVN  
RKNKSGESNHDKCLGLAVLIWGS DGMNVE SPVKKDESILVKGKANSKEKKVEKPLVIED  
EQVILGADSEWFEEFSLVPVIANLGLDEYSVKKKWSKVSLETKKKIQEKMKVVDKAKKCEL  
LLAEMDVLKDVTSVLAQTN

>AtGeBP16

MVTPKQIDFSSCVGADNSNGTLSHRRSPRNIPSSKRAASVAEEETMKKKMKMKKKKKKLD  
PPLIVRIWNEEDEL SILKGLVDYRAKTGFNPKIDWDAFCSFLGSSIVERFSKDQVLSKIR  
KLKRRFHVHSEKINQGNDPKFTRSSDSEAFGFSSMIWGQGDDGMDKEHEVNNGAAENR  
TNESGEEMLKEHEEEVANTELLNENGAAKTTENGTS SGERHDEDNDDDELCAVQDAFE  
AVMSQGLSGYQKKLQLEKLMNLGNGKRRELSDEWKALCVEETRFNIIKKLRFSAKLAEAN

DS

>AtGeBP17

MTKKLDPPPTAPSSDEDDVETSEDDSSSSSEEDPIKSLPATTAAAPAKSTAVSAATPAKST  
SVSAAAPSKSTAVSAAADSDSGSESETDSDSESTDPPKSGSGKTIASKKKDDPSSSTATL  
ALPAVKSGAKRAASEAATTSTKRVKKDEESVKKPALFQRLWSDDDEISMLQGMIDYHADT  
GKSPSADTNAFYEFQKKSISFEVSKSQFSDKVRSLRKKYRAKEGKDEPRFVKAHDKKAFE  
LSKFIWGPKGIALDSNAKSNGVSKKSASKTEKLD SVKQDLAFVGVSSSTNGDDWFEKSSL  
ARMIAGSGIDEYYVRQKWSSFTLETKKIVEEFQLMQAKELEAMLKSVRLTDLTSYFVD  
ASKN

>AtGeBP18

MVSVQNLKTDQLLNFLFKNPTKFLSRFSPMAKNKTLVTPSTVKKSSDVASTSKKLSGVAS  
PAKKPSGVTSPVKKPLEAVASTSSEEEEEDEPSSDSESGSESESDTEAEPMTLAAAAPSS  
SNEKRQSEGKPEEERAKTETETGKKPLLQRLWDEDEIVFLQGMIFAKDTGKNVSEDM  
NGFFEKLKDSISFEVKTDQFVNKIRSMKRKYIENKTTTEHDKKCYELAEIIWSDGDAT  
ALVKPKKKKLKVDEESDWFERSFVDGAFKELGPGVDEETWKKNWSLVPVKKRKRIEEKVK  
SMQADELKTTWQKIDVVHEMRSLMAKYV

>AtGeBP19

MAPKQLKKIENPVVSSEEEESASSGESATSGEESDSSADSPVKESSKKPVVVS KPSGSK  
TTTTKPESSTAARKSFECTDEMSKKKSKNSMGEEDVKKKDETLKKNLFVRLFTEEDEAILL  
QGFLDFATKKENPSDHIDDFYESIKNSISFDVTKPQLVTKIGNLKKKFNGRVSKGLKKGK  
NEEVMVFSKASDQNCFDLSRKIWGSNGVLYSKSKNMRQVQLGGSVKVDEDDQEPQKHRFV  
ISTLSSGQELVSYLKVENPNSLGVDDTKWSAKLDKIKDGKQKRKMEKNLKKIQAKEEELS  
MMRSEFVAAVTNVLSKQDNASYSCK

>AtGeBP20

MAPKKAEEVVEPPVSSEEEESGSSGEESESSAEVPKKVESSQKPESDSEGESESESSSG  
PEPESEPAKTIKLPVGTGKPIPETSGSAATVPESSTAKRPLKEAPEAIKKQKTSDEHV  
KKPITNDEVKKISSEDAKKMFQRLFSETDEIALLQGIIDFTSTKGDPIYEDIDAFCIYVKK  
LIDFDATKNQIVTKLQRLKKKFNNAVKNSLKKGKTEDDIEFAKDLEQKGFELSRKIWGSN  
GVLVTGKSSRKKVGGTPAPKEMKLVAHSTPKKQQEEAKKPERTEAKVVNTGLSIGKEIAS  
FLNADNGSSCGLDESTLTAVWAKVADGAEKREVEEKWKKLKAKQFELCLQRSGLVNETAK  
MIFKAYES

>AtGeBP21

MATPTELGFSSPGGGGDDSDDNPPQKRTSKRTASETATEEETKKKKKKKTKHNTKMASPP  
SNRIWNEEDEL SILKGLVDFRAKTGLESKIDWDAFYCYVKGSIHVKVSKCQLMSKTRKLK  
KKFLDQMEKIDQGNDPHFTRSSSETA FGYSMMIWRKIDAEYTNGVMDKAHQSES GEEVFE  
EDEEVALIDKGAASKGKSPHEAVVVVDKITTKKNGTAGKESDDDDDDVLCVRDAFETTM  
MSQGLSDYQKKLQLEKLMNLGTGKRRELSNEWKALCVEELKLNINKLRFSAKLAEAAANDG  
K

>AtGeBP22

MASDQRDITDFAESPDLEEDGGGGGGGRGGGETESDEDVVIPEPNEAEDDDHDPDPDPEY  
EDLNSPSMISRAPATKSSSGTVTVALPAGSAVPVASIPSDSDQKWHRMTEIVHQRPPIDD  
SRRLFQRLWDEDEIELLRGFLDYITNHRGNSSHPPDTAPFYEQIKSKLQLEFNKNQLVE  
KLRLRLKKKYRNVMSKFSSGKEVFFKSPHDQATFDISRKIWNQTGKIIGFEDNNVMDLEET  
NHVNNANGSSGFNVSVIGNANVDVDSENGLEKKVTISRKRSRSRIGKIDEDKPVLAPCDG

VIPNAVNLNENVAVGCDFGDGRNLGVLIEETVKNCVSPMIKEMMNSTTGMMMAATGGFPG  
GGAHALGVLSPMLMPSMNLGFGGKGVGDERWRRQQILELEVYSRRLELVQEQRATVNEL  
KTMPNGG

>AtGeBP23

MDKANTNRSKKEVCGGSGEAKPTGKKRKNERTLTNKNVNAKKSMMDFKALTRHNPSDDMT  
GAYNFLHEYISVDVYSYEFVEKMKSLKKKLEKMGINAKDLSSSIGSELLKLIWRYDVKS  
VVEYNLLKIEQANFTSHPQISFNNSEPCKTNL

>OsGeBP01

MPCGYGVPIISTLDFTARRGTTFASHQYDTGPFYDEIRRRLSFDFTKSQLVEKLRRLLKKK  
YRLCAARMASPHAAAAGFAFRTPHEGAIYDLARHIWPPALKRDGTASDDDDINPAAAAA  
TAAVMPVAMEDGFGGSAPTPTPTPRGRGRRVRRRMAQEQAALPSAPALTSTDGAHQ  
EPLVAAMENTLPQIAQLPPVSETEPMPVIANGANEEAVRSVLSRLLKEFITSFAVVGQTG  
PGMGLNMFGGAGLNADIAGLGFGIAGLNPVPGADRWRQHQILELEVYLKRIELVREQV  
TAALDELRSEGG\*

>OsGeBP02

MRRRSPPPAQAAPRPPTRAAESGEEGDPGKDEVAAPPKGDSALPRSGSGFGSGNAAAP  
DGPAPSPMPKPKRVTAPPSSDHGSRENLAAGSPSNEVPTPQGDDAAQEDDLPEPSPKSKK  
NRKKKKKALRAGDSGKVAAPDDPAEPTRPQQDVGEVDGRLAESEQEVPPNAGKAKKKASA  
QARKKPSAKQHAAAQEEEDGDLMAEAEVAPWQGDEEDGKGPLPQRKSKRVAALSGSIC  
PPDPKRAKIVDAQKPGFGRKWNGNDEIMILEALVDQIRSGGNVPQEPGHPLFHELVRLE  
GRTFNHSDVRDKVRSKRRYNDVLSGLAITKDHLQLHELSCFIWGRSAHAGDDKQRC  
LARDEQSSSLARDEQKSFARDEEKSARDEQSSSLARDEQKSFARDEKSARDEEKSASDE  
QRSFDDMCKQFPLLAKEIKVLMEGQPAIMELFPRLDGDQVVAIEKKLENLRWIDMKRKKK  
MAVKMAKIRKGLIYKLEGAAIADGNMIH\*

>OsGeBP03

MARKRRAPTTPPPPPPPPEAESSADSSGEEEEEEEEEEEEERESPVAPPPQKPSGRGAASS  
DEEEEEEEEDSDTDYTAQGFQLRKVGGDEEGEEVEGDSSESEPEPEPVKKESAKKAKAEA  
KKKRAAPEPAPSGKAKKAKPEKSSSAAPEPAPSSGKSKKAAKAAKAAAAEPAPSTGK  
VSKYNLAPEPSPSSKSGKALSRWTTDDEVKILEVLVAHFKSHGTQLKVEGIIAAVGSLE  
RKSIIKYSIDMYEVRRLKQRYEATAKKVEHGGDLPAKEDDLRMYQLSSEIWGKNAKDAGNS  
SKNKKGQAKKDKVSGDSKEAAKEDKVDEAAI AVNEKGGTLAENKKGKTNKQKTGMETKVG  
SSKEAALAASPTKGGKKGSHKDKLDEEAKSGTAKVTSTIATDDDDGTLGGSKREKAGKEE  
LDGDTHIVMPKEATTTAASDDGTLVGSKKGKADNGKLDGDTHSVMPKEATAGTQNGGILT  
GGENHKEKVKDANVPSIRREYAELQSLYPNLASFVNGIEAQHPCGSTFKRAFEFISDDK  
ACTLESKIKKQKIAEVRMQLRLADTKKEVANALLGLLD\*

>OsGeBP04

MPSKRPSQSAMDAGAAPASPPRSSKRRSRPKPRAGDAARHPAPNPSPPPAAAAAPASS  
RSRERERKRRQRGAFADPAAVTAPAAGGQHGGAVQKLWGDADVALLAGAAAFRARAGHV  
PRLPDMGALFDSIRGSLSPHIDQAKVYYKLKRLKGKYLHAAPGASAGPHERRVRDLCASV  
WGADLEPLAEGDDERAAAAAQAADQRTVPDAAAMLVLTMLDEYWKTDGRALSSVS  
LAKGLSLLGTEEARFIEGKWRRQLDSEIQTQMRRHDLAKEVYALLMDAIIKALGP\*

>OsGeBP05

MAPKRPTPPPPPPPVASSEETASGSDSDESEEEEEESPLAQPAVVSNKGAESDSSGEEE  
SEEEEEEDLVRSSATKSRDPPQENREEDDSSDEEEDSESEKAEAPPPPPPNPAPKQGA

EGNGPKVSSPKRQAFHRIWSTEDEVRIEALAAHREHGSLPQTDAL IATLAGSLDNTGY  
GRKELQGKVSTLKRRIESTAKKKGDLPSKGHRRLYDLSKSVWGSEAAAAAVNGTTAPR  
EFGEMCELYPHLAEVKKLEAAHPGLFKRDFGKLDDDKAHALDMKIKKQRIAEISVVLRR  
GDLTKEVTKVLAELVE\*

>OsGeBP06

MLPTVVDDPSAAAAAAGAAASSSFPDADVGNDSDDIDFSPDPNHATTQAFSSAAAAA  
AAAGPGGGGAGSGSGGERRPLFQRLWTEEDEIVILRAFAEFTAQRGTAFASHQYDTPF  
YEDMRRRLQLDFSQSLVEKLRLKRKYRNCVDRLRATGQSFSFRSPHEQAI FEIARGIW  
RPTSDKHGRDADSDDALPDAAA AVAPAPANGEVRSPSSTRAQQRRGRRRTAAAAAAT  
ATAADASEPPQYPAPAPAPVKAEDALPHFFPQGA AVTATAHVHGVDPASAAASAAANA  
EGGILAPL FKMVRAML TAGMAPPSLEPPAPGIPMKGERWRQQRILELEVYLRRIDL LQD  
QVRTALEELKSTPPATQ\*

>OsGeBP07

MASDQTL PVPVSVELPPAAPNPPDPTAPLLPHADDPSAPPA AAAAAARKLPVKRRSPPPRP  
SSPSSSDPASSDPAKQPPQPPPPFKFQRIWSESEDELFLQGLLGCGAQGLVFPRDLNV  
FYDRFSESMPSPYTRSQLSEKLRLKNKFRGMSARVARGLDPARLAPHDRDVLHLC SRLW  
DPANAATSPFAAAGDASSGNKRRRAAPRAGPLMPPDPSGDSNSHDYNGG ISAGTPGAFGD  
GHGGEEMMYLEQESGHFGYHGDAIAADGSLDGIVKVQPETLPALPSIGDIAVHSENGNG  
KAVVPRSNEHHMANAVLDIFEECLREV KANGITYGANVNGGSELARRWRAQRIDELDVLS  
RRLRLLEDAAAAGR\*

>OsGeBP08

MSSSRPPPARAAATEAAADAALPLHPSSPRSKKRSSSSRRAAAGDRRPAARAPNPSLSPR  
GGGGAPSRKSERRRRPRSLAMAVHGHASTSGGGLVWNDAD E VALLTAAVAFRANGFAP  
RLPDMGALFESLRGSISSHIDQAKVYYKLKR NKSFLHAPPQATTTTPHRRVRALS AEL  
WGSELAPPAVEGDADAAEAADERDAEEGYIGGNLHVS VRLPVVSEVLGDYWRKNGRVL SG  
VSLERGLALVGPEEGRMAEAKWKRL EVETQTQGRRHDLAKEVCAMLIDAVRGLGP\*

>OsGeBP09

MLPAGGYPSAAAI SFPDADVDDSDDGDFTDAPLIDPSDPTFPNPASSSAAAAAMATPAS  
AGGGSGSVGGVSSSGGERRPLFQRLWTEEDEIVILRGFAEFTAARGTAFASHQYDTP  
FYEDMRGRLQLGFSQSLVEKLRLKRKYRNCVSRLRGSGSAFSFRSPHEQAI FEIARNI  
WRPTNKHGRDGDSDDEDATQVTPAPVPVNTSPNDHNANYSDNGGLGTPQIAGHATSAGCF  
RCRQELLDASV\*

>OsGeBP10

MAPKRPA AASGSASEASDCEAGGAGRRRSPSRSPSRSPSRSKTPPHNAAVLSST  
PASA AVDFVAASDSDAGADADARLASPRRSRERSPRLHSDSDNSAAATAEAAEAAAAA AF  
DDGDDEGNATPPPRSRRSRVEATGVKPISSRPMDASRRPAAASSQSQR SRKRPRSSPTQ  
HSPEQHKRP RPVWNPQDEV TILRALISYRAKNGALPGSSQDTGKLHN MIRQLSVKASTT  
QLSDKVRRLKHKYNLILTRVTKSGRDPDLPT EHDREVYELSKKVWGTSKGGAGAGSGGGG  
GGGGGRVYENAEVVQSDEEQSRDSDSDMESGWDDRDRHNRRLKAI VVANGNGNAV TGG  
RSVHNGSGKGDVADKGKDMYPYLWEAVEELSKEHPSGTAFRKA FGVL DGSRRAMEEKL  
NRFRLSEIRQQLRRMDLMKETIKMVLDAL EGS DL\*

>OsGeBP11

MAPTL PVPVPAHGDKKKKKKKKPLKPSQEEEEALPLPLPPDRKRKKASEPVNSPERAK  
KKKTATPHEPPSAKQQRPLPFQRTWSPNDEV LILEAMAAHRQE HGKVPTAAELFPVLNG

RLDRKRLTYKKLADKLRTFMRRHGRDAKNGPPTQAHDRRLYDL SRNVVVSQTQPPNLSAN  
ANSNIAGGQPNQHDAMPTAGKAFDKMRDSYPNLTQALLLVGTDLEKALTAIDETKAQAL  
DLKVSNLKKELSEAVMESATIQSTESSKIPCFPSTKLQPEFGAEIEKNFQLEHLDEMKG  
QVKLARMEQEILELKQNFLAFQSQQMADSKQQHDKSSAKGIICESSESGLRSIVADNNIL  
CNTLQKEMVVQQKLSCGKTKEVTSKHRHPQKLVVFPF\*

>OsGeBP12

MSSWWSWRSLFSSLANANGGGSNADASSSGSGTSSSPPVHEAQAAAARRRSARTKKPPEEE  
AAGSQPQPKTRPSPASKASKAKVLLLLGDGEPKKKPAPNPTPTQKRSNKRKRSWSRADEL  
RILEAMANHANAHGGALPEASDLFAALASSLERGDADLPKLADKVHKLKRWYDNARLPQR  
CPTDDDDTRRLFQLCGKVWGPSTVLRTPRQRHKVVGVLVQGNGANPQPAAALKVKEK  
RVRRELSLYVLYPCAQEVKAHANHEYGELIGTAFQFIGDDEARCYDDRYRKMLVDKLN  
KKEHADVTKSLLCTLAGYIN\*

>OsGeBP13

MAPKRPAEEADAAAAAAAAAGGSASEGSDAEASAEAARGHGSSPSPSKTPPPANPNPKSA  
AAPP SAVAAPASAAGSDSGAASDSPRAAGNPSGPRSIEVNSDSEDSALPLASDAYADQAA  
AAGAGAGADSDDGNTSPLPPRPSRAEAAAIKPISSRPMDPPRRSAGGSEPRAKRPRSA  
AVASSAEHSCRPSRVWSQADELVILRGLITYRTKRGVLPGSTQDIGKLHSYIRGQLSAKV  
STTQLSDKVRRLKQKYQMLATRAKTGKEVFPTPHDHNIYQLAKKVWGTMTAGEGGGSGY  
DNADAGESEEEQYGRESDDMESGRDNRHRKNQRSVPVTMANGNGTGIGAVNAIVRGRSE  
FEKGKDVYPYLWETVEELSSQHPTGAVFKKAFELLEGSKAQVMEEKLRKFRLTEMRQQLR  
RMDLMKDTLSMVLDALEMAD\*
