# Supplementary material for: Genome-Wide Characterization and Expression Analysis of GeBP Family Genes in Soybean
Source: MDPI journal article supplement (doi:10.3390/plants11141848), 2022-07-14
Supplement: s1 [file s1]

>GmGeBP1

ATGGCTTCGGAGCAACACGACGCCGTTTTCCGCGAAGAAGACATGGACGACGACGACGAC  
GAGTCTCAGGAGGACGAAGAGTACGAAGAAGACGACGACGAAGAAAACGTGCCCTCTCCC  
TCCACCGCTCTCGCTGTACCGTCGCCGTCCCCGGTTCGCCGTCTCCAACGGCGGCGGT  
GGCTCTCCAATTTCGAAGCCCACCGCCACCGCCACCACCGCCACCATCGTCCTCGCCGAC  
TCATCCGATCCGAAGCGGCGTCGCCTGGAGCTAATCGAGGAGAAAAAGCCGCCGCCCG  
CTGGATGACTCGCGGCGGCTGTTTCAGCGGCTGTGGACCGATGAGGATGAGATCGAGCTC  
TTGCAAGGGTTTCCTCGACTACACATCGCAGCGAGGATCCTCGACCACAACGACACCGCT  
TTGTTCTACGACCAAATCAAGTCGAAGCTCCAACCTCGATTTCACAAGAATCAGCTCGTG  
GAGAAGATCCGAAGGCTGAAGAAGAAGTACCGGAACGTCTCAACAAGATTTGCTCCGGC  
AAGGAATTCTCCTTAAGAGCGCTCAGATCAAGCCACCTTCGAAATCTCGCGCAAGATC  
TGGAGCAACGTGACTCCAGTCGGCGACAATTCATTGGACGACGACGAAATCAACCCTAGC  
CGTAGCCCCAACCTTAATTTTAGCCCTGTAATTCTTAAGAATGAAACGATTTTC  
AGGAATTCACGGAGAAGAAAACACCGAAACGCTCTCGGCCTCGATCGGCGGTGAAAATC  
GAGCCAAATGACGGATCCGCGTCGAACAGAGATCATAATTGTATTAGCAATACTACACCT  
ACTGCTACTGCTGCTACTAACTACTGCTGCTGCTGCTGCTGGTACTAACAATAAT  
AACTGTAACAGTGGTTATGGAATAACATACCGAGTTTGATTGAGGAGACGGTGAAGAGT  
TGTTTTGTCGCCGTGTTGAAGGAATTGATGGCAGGGGCCATGGGAGGAGGAGCGTTTGA  
GGGAGAGGGTTTTCGTTGAACTTGAACCCTATGCCTTTTATGAATTTGAGTTTTGGCGGT  
GGGGAATGGTGGATGAGAAATGGAGGAAGCAACAGATATTGGAGTTGGAAGTGTATTG  
AAGCGTTGGAATGGTGCAGGATCAGATCAAGGCAGCTATGGAGGAGTTGCGGTCACAT  
GGAGGAGGAGGATTATAG

>GmGeBP2

ATGATGTCAAGTGACCGGATCACCTTAAAAATTGGTCCGCCTTTACTATTTTCTTTTCCC  
GGCGAAGTCCGCGGTTTCTATTTGGTATCTGCATTTCTCCACCAGAAGCAGCTACCTCCC  
CCCATTGAGGCCTCTTCCGATGAAGAGCAACGACCTTCCTCCAAGCAACACACAGAAGAA  
GGAGTTTCTCTTCAGAAGAAGCTTCTTCCCAAGAAGAAGACGACGACGACCAACCTCCC  
ACCTTCTCTCGCTTCCGCAAACCCCAACCGAAACCGTCGTCCTCCGACTCCGACACC  
GACTTCGAGCCCACCAAAGTAAAACCAAGCCACGGACCAGGCCCAGAAGCCCCAGCCC  
TCACCCGCGCCGCCAAATGGGGATCCAAGCGCCCTGCCCAGAACAACGCCCTGCCACT  
GACCCGAAACGCGCGAAGAAGAAATTGACCAATTCTTCTTCCGCCGTGCCGCCACGAG  
ACGGAGGAGAAGTCCGGTGGCGGCCAAGCGAAGTTGTCTCAGAGACTCTTCAGCAAGGAA  
GACGAACTCGCCATTCTTAAGGCATGGCTGAGTTCAATTCGAAGACGGGCCAAGACCCT  
TACAAGTACGCCGATGCCTTCCAAAATTTGTTAAGAATTCGCTCCGCGTGGAGGCTTCG  
AGCAACCAGATCAAGGAGAAGATCCGACGGCTGAAGAAGAAGTTTGAACTAAAGCACAG  
AGAGCGAAGAAATGGGAGGACCCTGAGTTCTCCAAATTCACGACCGGACTGTGTTGAA  
TTATCAAAGAAGGTTTGGGGAAGGAGCCAATGGGCTGGTGGAGAAGCCAAAACCTAAT  
AATGAAAAAGAAAACTGCCAAGACTCCAAAGAAGGATGCTACTAGCAGGAATGTAGTA  
GCAAAATCTGAACTACAACACTACTGGAGTCGATGGAGTTGGAGGAGTGTGGGAATGTA  
AATTTGCTTTACCGCAAGTATCTGGTTTCAAAGAAGTGAATGAGGATGAGATGAAGAGG  
GGATTGGCGTTAATTGGAGAATCTAAGAGGAAAGAGTTGGAGGGCAAGTGGAGGAAATTG  
CGACTTGCTGAGATGGAACCTGGTTGCGAATCGCTCACTACTTATTGGGGAGCAGATTAAG  
TTGATATTTGAAGCACTTCAGTAA

>GmGeBP3

ATGGAATCCGATCTAAACGACGCCGTTTTCCCCGAAGAAGATCTCGACGACGACGACGAC  
GATGAAACTCCAGAGGACGAAGAGGACTACGACGACGAAACCGAACCCCTCCCTTCGTC  
CTCGCCGTCGTAGCAGTCGCGCCGCCGCTTCCACCGCTCCGAAACACTCGACACCACG  
TTGATCCCGATCTCCGCCGTCGCCGATTCCCTACTGAAACCACTGCACCCGGAGCTAATC  
GAGGAGAAAAAGCGCTGGACGATTTCGCGGCGACTGTTCCAGCGTCTGTGGACGGACGAG  
GACGAGATCGGGCTCTTGCAGGGGTTTCTGGACTACACGGCGCAGCGAGGATCCTCTCAC  
CACAGCGATACCGCCTTGTCTACGACCAAATCAAGTCGAAGCTCCAACTCGGCTTCAAC  
AAGAACCAGCTCGTCGAGAAGCTCCGAAGGCTGAAGAAGAAGTACCGCAACGTCGTCACC  
AAAATCAGCTCCGGCAAGGATGTCTCCTTCAAGAGCCCTCAGACAAAGCCACCTTCGAA  
ATCTCACGCAGGATATGGAGCAACACCGCTCCAATAAGCGGTCCCGTCGAAGACGACGAC  
GAAATCAACCCTAACCTAATTTTCGGCAATTCCGCGAAGACACCTATCTCGCGGAAGCGG  
TCGCGGCCCTCAGAAGCGCGAGTTGAACGACGGTTCAACATTGAATAGAGATAATAATTGT  
ATTGGAATAATAATAATAATAGCAATAGTAATAATAATAATAATGAGAATTGTAATGGT  
AGGCATAACTTACAGGGTTTGATTGAAGAGACGGTTAAGAGTTGCGTGTGCGCCGTGTTG  
AAGGAGTTGGTGTGTGGTACCGGTGGCATGGAATTGGGAAGAGGGTTTGGAGTTGGAGGA  
GGGCTTGGAGTTGGAGGAGGGCTTGCATTGAATTCTTGCAACTCAAATGACAATGCCA  
ATGACTTTATTGAATTTGAGGATTGGGGAACAACGATGGATGAGAAGTGGAGGAAGCAA  
CAGATTTTGGAGCTGGAAGTGATTCCAAGCGTTTGGAATTGGTGCAGGATGAGATCAAG  
GTTGCTCTCGAGGAGTTGCGATCAGCTGGAGGAGTATAA

>GmGeBP4

ATGCACAACCTGCCATAAACGAACAAACGGCTACCTTGACACTCTAATATGCGAAAAAAGG  
AAATGTGATATCTCCTCAACAATGCTTTCCCGGTTGGTTTCTTGGATCTTGTGCCCCTCC  
TCTTCTGAAGAAGAAGAAGAAATCCTTGACATCATCAAAGATAATGACATTAACCATGAA  
AACGACCAAAAAGTTCAACGTAGAAGATGACAAGAACGACCATTTTCTTAACATCATGCGAT  
GTGGACGACACCATTCCCATTGCACTTGCCGTTCCCAATGCCTCCCCCGCCGTGACAGTG  
GCCTTCCCGGCCAATGACGAAAGAAACACCGTCCCAACCACCGCCACTGTGGCCACTATA  
GTAACACGCTCAAAAGGGCAGCGCAACGCCAAGTATCCGGAATGGTGAGACAATACCAA  
AGGCTGCGGACGAAGGAGGATGAGATGGAAGTGTGAAGGGATACCTTGATTACGTCAAG  
CAGCATAGAAAGGAAACACCACCCTTCTTTACGTCGTAGTTTCATGTATGATCACAAC  
CAGCTTGTTGAGAACTGCGTAGGTAAAGAGAAAACACAAGTTGGCTTTGAAAAAGGC  
AAGGACAAGGAGTTCCCTTTAGGAACCCCCAGGAGCAGGCCATTTTGAATTTCCAC  
AAGATTTGGGCCAATGACACAGATAATATAATAGTCCAAGATGCCTTGGATGGTGATGAA  
TCAGGACACACTCCTGAAAGTCATGATCATGTTGGCAACGTCAAGGTGAAGATTGAACAA  
GTTGACAACAGTGATGAAATAGGCAATAGAGTGCCAAAGCGTTGCGGCTAGATGATGCA  
GACGATATGAACAGAACAATGACCAGAACAATGGTGATAGCATACAAGGCTTCATTGAG  
GACACCATGAGGTCCTGTTTCTACCATTGCTGAAGGAAGTGTGGATGAAGCACAGGAA  
GAGTCACTTCTGAGTTGGAGGCAATCCCAATGCCGCTATGCTCCGGGGAAGTGGACCAT  
GAACATGGAGAAAACGGAGGATTTTGGAGTTGGAGGTGTATGTGAAGCGGTTGGAGTTG  
TTGCAGAATCAGATCAAGTCTAGATTGGAAGAGTTGCGATCTAGCTGA

>GmGeBP5

ATGGCAGAGAAGCAAAAGCTGCGCCCTTCTCCTCTCGACGAGCCACCCACTGCTTCCTCT  
TCCGATTCCGAGGAAGAAGAGCCACAACAACAACCATCCTCCCAGAAGAACAAGAA  
GAGGAAGACGAAGAAGTTTCTCCGAGAAGAAGAAGAAGACGAAGAAGAAGAAGAA  
GCTGCTTCTCCGAAGAAGAGGAAGAAGACGAAGATCTCCACCACCACAGTTTCCAAA

AACCTCCACCCCTCCCGCAAACCTCAGCCCCAACACTCTTCCTCCGAATCCGAAACC  
GAATCAGGATCCGAGACCGAATCCGAACCTGACCCACTCCCGTCAAGGTCAAGCCTTTA  
GCTTCCAAGCCCATGGACCAGGCCAAAAGCCCAAGGCCAGCCCTCCCCGGCGCCACCC  
CCAAAATTGACACTCAAGCGCCCCGCCGAGAACAACAACAACGCCCGCGTCGCCGAC  
TCCAAACGCGCCAAGAAGAAAGCCACCGAATCTTCTTCTGCCGCCAACTCCGCCGCGGCC  
GCTGCTTCTGACGACGAGATGGAGGAGGACGGGAAGAAGTCCGGCGATAACTCGAAGAAG  
TTTCAGAGACTGTGGAGCGAGGAGGACGAGCTCGCCATTGTGAAGGGCGTGGTTGAGTTC  
ACTTCGAAAACAGGGCTGGACCCTCTTAAGTTTCCAATACCAACGCTTTTCACGATTTC  
GTGAAGAAGTCGCTTCACGTGGAAGTTTCTGCAACCAGCTGAAGGAGAAGGTCCGAAGG  
CTCAAGAAGAAGTTTGAGACCCAGGCTGGAAGGGAAGAACGGAGAGGCCCTAAGTTT  
TCCAAACCGCACGATCAGAAATCTTTGAATTGTCCAAAAGGTTTGGGGACGTGAGGTT  
ACTGCTGGAGCTAATGGGGGCCCCGTGGAGAAGCCCAAGTCTAATGGGAGTGCTGTCAAG  
AGTCCGAAGAAGAAGGAAAGCGGTAGCAGGAATGTGGCTTCTGCTAAGAAACCGAAGCCT  
GAATCAAAACCGGAGCCGTTCCAGTGCTGTCTTGGAGTATAAGGATTCTGAAAAGATG  
CAGATTAATCAAAAGCCTGATGGTGGTGATGCAAGTTTGTGTTTTCGCGCAATTGGCTCGA  
TCCAAAGAGGGTGCAGTATTTGTAAGCTGGATGAGGATGATGTGAAGAGGGGGTTGGAG  
TTGATTGGAGAGTCAAAGAGGGCAGAGTTGAGGGGGAAGTGAAGAAATTACATCTTGCT  
GAGATGGAAGTGTGCGAATCGCTCAGAACTGATAGGGGAGCAGACTAAGTTGATACTT  
GAGGCGCTTCAGGCATCCGATCATTAG

>GmGeBP6

ATGGCTCAAAAACAAAAGCTGCGCCCTTCTCCTCTGGACGAGCCACCCACCGCTTCCTCT  
TCCGATTCCGAGGAAGAAGAGGAGCAACAACAACAACAACCATCCTCTCAGCAACACGAA  
GAAGAGGAAGAAGAAGTTTCTCCGAGAAGAAGAGGAAGCTTCTCCGAAGAAGAGGAA  
GACGAAAATCTCCCCCACCACCCATCTCCAAAACCCCTCCACCCCTCCTCCCTCAAAC  
CCTCAGCCCCAACCCACTTCTCCGAATCCGAAACCGAATCGGGTTCCGAAACCGAATCA  
GAACCCACCCCACTCCCGTTAAGGTCAAACCCCTAGCCTCCAAGCCCATGGACCAGGCC  
CAAAAGCCCAAAGCTCAACCTCCCCGGCGCCGCCGCCGCAAAATCGGCATCCAAGCGC  
CCCCCGGAGAACAACAACAACGCCCCGTGCGCGACCCCAAACGCGCAAGAAAAAA  
GCCACCGAATCTTCTTCTGCCGCCGCCATCTCCGACGACGAGATGGAGGAGGACGGAAG  
AAGTCCGGCGATAACTCGAAGAAGTTTCAAGAGACTGTGGAGCGAGGAGGACGAACCTCGCC  
ATTCTGAAGGGCGTGGTTGAGTTCACATCGAAAACAGGGCTGGACCCTCTTAAGTTCCCC  
AATGCCAACGCTTTCACGATTTCATGAAGAAGTCGTTTACGTGGAATTTTCCAGCAAC  
CAGCTGAAGGAGAAGCTCCGAAGGCTCAAGAAGAAGTTTGAGACCCAGGCAGGAAAAGGG  
AAGAATGGAGATGCCCTAAGTTTTCAAACCGCACGATCAGAAATCTTTGAATTGTCC  
AAAAAGGCTTGGGGAAGTGAGGATGGTGGTAGCCAATGGCTCCGTGGAGAAGCCCAAG  
TCCAATGGGAATGCTGCCAAGAGTCCGAATCCGAAGAAGAAGGAATCCGGTAGCAGGAAT  
GTGGCTTCTGCTAAGAAACCGAAGCCTGAAACAATCCGAGCCGCGCCGGTGCCGTCC  
TTGGAGTTTAAGGAGTCTGAAAGGATGGAGATTGATCAAAAGCCTGATGGTGGTGATGCA  
TGTTTGTTTTTTCGCGCAATTGGTTCGATACAAAGAGGGTGCCAATGTTTCTAGGCTGGAT  
GAGGATGATGTGAAGAGGGGGTTGGAGTTGATTGAGGAATCAAAGAGGGCAGAGTTGAGG  
GGGAAGTGGAAGAAATTACATCATGCTGAGATGGAAGTGTGCGAATCGCTCAGAACTG  
ATTGGGGAGCAGACTAAGTTGATACTCGAGGCGCTTCGGTCATCCAATCATTAG

>GmGeBP7

ATGGCTTCTCAGCAACACGACGCCGTTTTCCGCGAAGAAGACATGGACGACGACGACGAC

GAGTCTCAGGAGGACGGAGACTACGAAGAAGAAGACGACGACGTTTTGGCCGACGACGAA  
GAAAACGAGCCCTCTCCCTCCACGGCTCTTGCCGTCACCGTCGCCGTCCCCGGTTCCTCC  
GTCTCCAACGGCGGTGCCGCTCCAATTTGACGCCCCACCGCCACCACCATCGTCGTCGCA  
GACTCTCCGATCCGAAGCGGCGGCGCCTCGAGCCAGTCGAGGAGAAAAAGCCGCCGCG  
ACGCCGGACGACTCGCGGCGGCTGTTTACGCGGCTGTGGACCGACGAGGACGAGATCGAG  
CTCTTGCAAGGCTTCCTAGACTACACCTCGCAGCGAGGATCCTCGCACCACAACGACACG  
GCTTTGTTCTACGACCAAATCAAGTCGAAGCTCCAACCTCGATTTCAACAAGAACCAGCTC  
GTCGAGAAGATCCGAAGGCTGAAGAAGAAGTACCGAAACGTCCTCAACAAGATTGGCTCC  
GGCAAGGAATTCTCCTTCAAGAGCGCTCACGATCAAGCCACCTTCGAAATCTCGCGCAAG  
ATCTGGAGCAACGTGACTCCAATCGGCGACAATTCCTTGGACGACGACGAAATCAACCCT  
AACCGTAGCCCCAACCTAACCTTAATTTTAGCCCTATAATTCTTAAGAATGAAATGATT  
TTCAGGAACCCCGCGGAGAAGAAAACACCGAAACGCTCTCGGCCACGATCGGCGGTGAAA  
ATCGAGCCAAATGACGGATCCGCGTCGAACAGAGATCATGATTGTATTAGCAATGCTACG  
CCTACTGCTACTGCTACTGCTGCTACTAACAATACTCCTACTGCAGCTACTACTAAT  
GATAACTGTAACAGTGTTATGGAATAACATACCGAGTATGATCGAGGAGACGGTGAGG  
AGTTGTTTGTCCCGGTGTTGAAGGAGTTGATGGCAGGGGCCATGGGAGGAGGAGCGTTT  
GGAGCGAGAGGGTTTTCGTTGAACTTGAACCCTATGCCTTTGATGAATTGGAGTTTGGC  
GGTGGGAAATGGTGATGAGAAATGGAGGAAACAACAGATATTGGAGTTGGAAGTGATC  
TCAAAGCGGTTGGAGCTGGTTCAGGATCAGATCAAGGCTGCTATGGAGGAGTTGCGGTCA  
CACGGAGGAGTTGA

>GmGeBP8

ATGCTTTCCCCGTTGGTTTCTTGATCTTGCTCCCTCCTCTTCCTCCTCCTCTCCGAA  
GAAGAAGAAGAAGAGATCCTTGACATTATCACAGATAATGACATTAAACCATGAAAATGAC  
CAAAAGCTCAATGTAGAAGATGACGAGTGTGATGTGGACAACACCATTCCCGTTGCACTT  
GCTGTTCCCAATGCCTCCCCGCCGTGACAGTGGCCTTCCCGCCAATGACGAAAGAAAC  
ACCATCCAGTCACCGCCACTGCCACCACTGTCGTAACATGCTCAAAAGGGCAGCGCAAC  
GCCAAGTATTCCGAATGGTGAGACAATACCAAAGGCTGTGGACGAAGGAGGATGAGATG  
GAACTGTTGAAGGGATACCTTGATTACGTCAAGCGGCATAGAAAGGAAACCACCACCTC  
CAAAGCGTCGTAGCCTCGTTGTATGATCACGTAAGGCCCAAACCTGAACGTGAGTTTCAAC  
AAAAATCAGCTTGTGAGAACTGCGTAGGTTAAAGAGAAAAACAAGTTAGCTTTGGAC  
AAAGACAAGGACAAGGAGGTTCCCTTTAGAAACCCCAAGGAGCAGGCCATTTTGAATTT  
TCCCACAAGATTTGGGGCATTGACACGGATAATATAATAGACCAAGATGCCTTGGATGGT  
TATGAATCAGGACACACTCCTGAAAGTCATGATCATGTTGGCAACATCAAGGTGAAGATT  
GAACAACTTGACAACAATGATGAAATAGATAATAGAGTGCCAAAGCGGTTGCGGCTAGAT  
GATGCAGATGATGTGAACAAAACAAATGACCAAAACAATGGTGATAGCATACAAGGCTTC  
ATTGAGGAGACCATGAGGTCATGTTTCCCACCATTGCTGAAGGAAGTGTGCATGATGCA  
CATGAAGAGCCACTTCTGAGTTGGAGCCAATCCCAATGCCACTATGCCCTGGGGAAGTG  
GACCATGAACAATGGAGAAAACGGAGGATTTTGGAGTTGGAGGTGTATGTGAAGCGGTTG  
GAGTTGTTGCAGGATCAGATCAAGTCTAGATTGGAAGAGTTGCGATCTAACTGA

>GmGeBP9

ATGGAATCCGATCTAAACGACGCCGTTTTTCCCGAAGAAGATCTCGACGACGACGACGAA  
ACTCCAGAGGATGAAGAGGAGGAGGAGGACGACGACGTCTTAGATGACGATGAAACCGAA  
CCCCCTCCCTCCGTCATCGCCGTCGCGCCGCCGCTTCCGAAACGCTCGACACCGCGTTA  
ATTCCGATCTCCTCCGTCGCGGATTCTCGCCGAAACCGCTGCGCACGGAGCTAATCGAG

GAGAAAAAAGCGCTGGACGATTCGCGGCGACTGTTCCAGCGTCTGTGGACAGACGAGGAC  
GAGATCGGGCTCTTGCAGGGTTTTCTGGAGTACACGGCGCAGCGAGGATCCTCTCACCAC  
AACGACACCGCCCTGTTCTACGACCAAATCAAGTCGAAGCTCCAACCTCGGCTTCAACAAG  
AACCAGCTCGTCGAGAAGCTCCGAAGGCTGAAGAAGAAGTACCGCAACGTCCTCAACAAA  
ATCAGCTCCGGCAAGGAAGTCTCTTTCAAGAGCCCTCACGACCGAGCCACCTTCGAAATC  
TCGCGCAGGATCTGGAGCAACACCGCTCCAATCACCGGTCCCGTCGAAGACGACGACGAA  
ATCATCACTAACCCTAATTTTCGGCAATTCGGCGAAGATGCCTATTTTCGCGGAAGCGGTCG  
CGGCCCTCAGAAGCGCGAGTTGAACGACGGTTCAACGTTGAATAGAGATAATAATTGCAAT  
AGTAACAGTAATAATAATAATAATGAGAATTGTAATAGTAGGCTTAACCTACAGGGT  
TTGATTGAAGAGACGGTGAGGAGTTGCGTGTGCGCCGGTGTGAAGGAGTTGGCGTGTGGT  
ACTGGTGGCATGGGATTGGGAAGAGGGTTCGCATTGAATCCCTTGCAAATGCCAATGCCA  
ATGAGTTTAATGAATTTGGGGATTGTTGGGGAAACGGCGATGGATGAGAAGTGGAGGAAG  
CAACAGATTCTGGAGCTGGAAGTGATTCCAAACGTTTGGAATTGGTGCAGAATGAGATC  
AAGTTGCTCTCGAGGAATTGCGTTCAGCTGGTGGAGGATGA
