# Supplementary material for: Genome-Wide Characterization and Expression Analysis of GeBP Family Genes in Soybean
Source: MDPI journal article supplement (doi:10.3390/plants11141848), 2022-07-14
Supplement: s1 [file s1]

>GmGeBP1

TAATTAGCTCCTCAATTTTTTTTAAAAAATTGTAATTTAGTATTTTCATCTTGTAATTTT  
TTTTAATTGATTCCTAGATTTTTTAAACAACACTACAAATTATCTGGCTTATAAACTATCT  
TCAGGGACTCAACTACAAAAAATTACAAAATCAAGACCCCAATCACAACTTTTTTTTTTC  
AATTTAGGAACCTAATTA AAAAATTCTAAAATAGTTTAGAGACATAATGATAATTTAACAA  
AATTTGCAACATTTTATTATATTTAATGTAACTGAAGGAACCTAAATGAAAGCAAAAAA  
AGTACTTTGATTAAATAACTAATTAAGATGAACAAAATATTCATTTGAAATGTTATTTT  
CGCTGAAGGGGAAAGAAAACAAGCGACAAAACAAAATGCTAATTTAATTTTTTTATTGTGA  
ACATGCTATTAGCATAAATTAGCTTCCGTAATAATAGATGATTAATTTTTATCAGAAATAT  
ATACAAAATAAATATTCTCTTTACATATAATTTATTCTATACTTAAGAGTTAATCATGA  
TTTGATTTTTTAGAGTCATAATTA AAAAACACGAGTAATTATCACTTTTGTTCAATTGACGT  
TATTTTAATTTTAATAACAACGGAATCTTATAAACATTACTTTTAAATATATAAAATT  
TTATCATGAATTTTTTTCATGTGAGACAAAAAGACATAGAAGATAAGGATTTTATGTTT  
CACTTTTCAGATCAACTTGACCACTGCTGCAGCATAGTAAAATGTGTATATTTGATCTATA  
TTCAGCTGGTAGTTGAGACCTCCAAACTAACAGATTTCATTCATTTACGTTTGTTTCA  
ATTGACAATTACTAACTGAAGAGTGAATACGTTGACGTATTCCATTTGCATTACCAAGTC  
CTGTTTTGTTTTCTTTGTCTGCTTTTTTTTTTTCTCTCTGAATATGAAAAAGAAAGT  
GTATCATACAACATCGTGAGGGCACATTAGAAAAATTGTATTCATTTCAATTTAATTTTT  
TATATTTTATTTTTAAAAAAGCAATAATTAGTCGAATAGTTTTAGAATAGCAGTCTGAAA  
AATAAAAACTATTGTTTATATTTAAAATATTTTTAAAAAATATATTCATAATAGATTA  
AACACGCTTTAATAAATATATTTAGAACATTTGCATTAAAATTATTTTATTATTAATAA  
TTTTTATGTGTCTTATATTTTTATTGTGTGGTTAATTTTAAAAAATATTTTTGGAAA  
TTTTATCATAAAAATAACGTGATAATAAATTGATTTACACATAACAGGAAACAAAAATTC  
TTGAGTAATTTAATTA AAAATATTATATTGTTTTATAAAAAACATATATAGCATGTAGTACT  
GTGAACTTTGTAGGTTGTTAAATTACAAATAAAATACTAATTAATTTTAGTCATGAGA  
GAATCATTGAAAACATTGGCCTTAAAATATATTTAAAAAATTAATAAAATTTTCATTAA  
TATAAAAAATAGATTCTTTATGTTAATTATTTGTTGTGGAACTTGGTAGAACATAGACA  
TACTTTTCAGTCAATAAAACAAAACACAGAGATACTTCCTATATAATTGGACAGAGTTAAT  
TAATATTA AAAAATTTACACAACAAATTTGTGTCTAAATTTGTATGGCTTCTTCTGATA  
GTTATTGAATGAGTGGATCCTACATAATACTACTTTTCAAAGAGAGATATGGACATAAAA  
CTGCTATGCGTATGAGAATATCCTTTTTCCATTTTGACAACTCACTACTTTACATAGTAT  
AGTGGGCTAATTCTACTGTATACCTAGAACTTTTGGTGCTTGCCACCCATCTATATTAA  
TTTTTACTATTTCAAATATAAACGCATAAGATTATGATATATTCTTCTTCATTTTTTATT  
TATTATAAAGAACATGTTATATATTCTTAAATCCGATAAACTTGCCTGATTTGTTTAACT  
TCCCCACCTTATTCTCTCTA

>GmGeBP2

ACGTACATTTATAACTCTTTTTAAAGCAATAATTGATTGTGAACAATAGCACATGTTA  
TCTTATTTTTATTAAATTGAATTATTTTTTAATATTTTACTTATTATATGTCTAAACATA  
TAATTCAATTA AAAAATTTGAATATTTTATTTTCATTAAACAACAATATTATTTAATACA  
TAATCATCCTATAATATACAAAATGAACGTATTATCCCGTGCAATTGCACATGTTGTTGG  
AATTTTCATTTTTTCTATCAAATCCAAATTTAAAAATGAAACATTTTAATAAAAAGATA  
TTAAAATTCAAAGGTAATTTCAATTGCAAAACATTAAAAATATACCTTTTTAGGAGTTAA  
TTTTGTGTAAATCTCTTAAATTAATTCATGAATTTTTCTCTCAAAGAAGGTGTCATCAT  
ATATAACATTAATGTGCACACAATTCAGGGTACAAAGCAATTTTGAACAATAAAAAAAC

CTTACATACCTTGTAGTGGTGATGATGAAGAAGAAAAGTAATAGAGTAGATAAATAATAC  
ATCAATCATCTTGTACCATCTTGTTTAAATAAGAAAAAGTTGTATCTCCTTCAAATCCA  
TTAAACCTAAAAATCATGAGCCACCTTCTGATTTTAATTTAATCTTAACGTTATTATTT  
CCTAAACAAACAAAATTTTTACATTTAATTAGTTAATTCATTTTTTTTCTTATCACAAAC  
ACCTAAATATGAATGGAAAATAAAATAAAAGAATAAAATGAATTTTAAATGGATGATTGA  
TGATTTTATACCTTCTACGATTTTATGATTATCCATTTATTATTTGATAACTTTTTCTT  
TTTTAAATCATGATAAATGGGATTTATTATTTAGAAGCATAATTTAATTTATGTACCAT  
GTTAAATAAGACATTTTTAATGTAAAATAAAGACAAATCTATTTCAATAGAAATTTGTTG  
GAGTATAAGTGTGAGGTGAAGTCCTACCTCAAGTAGAACTAGGAAAAGTTGAGCACCATA  
TAAGTAACGAGAAGATCCATAAACCTGAGCCTTAAGGTTTGGGTATAATGTGGTGTCC  
CTTATATAGTTGCTCATGGTTCATTGGTGTAAATCTACATGTTACTCCCCTCAATTCTCC  
AACAAAATTAATATTAAGTATATAAAATGATAGTTACAAAGTTTACAATAATTATAATTT  
ATGAAAGATTAACATTAATTGTCTATTCAATATCATTTGAAAATAAAAGATATATTGGG  
AAATAATTATAGTATTTTAAATTTAAAATAAAACATAAATTACTCTCGGAACCAATTTA  
AGATCATATTGAAGAAAGTATATTAATTTTCATTTTTTACCTATAATTTAATTTATTTT  
TTCCACTTAATTCCTATACATAGAAAATGATATTCAATATTTTAAATGGAACATAAAATC  
ATCATCATTTCTATTAAGTATAAGTAATATAGTATTCTATAAATTATATTCAAAAGAAGT  
TATTTTATTGCACTCATATAACTATATGAATTTAATTTTATGCATTATAATTGTATGGTT  
ATGTATAGAAAATGAAGAAAAGCTCTCGAGAGTTCTTGACATTGTCATTGTTGAAATGA  
AAGAGTCTAAAAATCTAAATAAAGAGGTACCAGAAAAGAAAGTGAGATAGGCAAGAAA  
AGTAATCATATGCCCAAATGAAATTTGAATATGGTGACAATCATACCATTGATTAGATTG  
ATTGACCTTTCTCTATCAAGCACCATAATACCTTGAGGAATTACATTGGAATGAAAGAA  
ATTGAGAGACTGTGCAAGCATGAGATAGGTATAATTGATGATGACTTAGAAGAATTAATT  
AATACTATTTATACCAATAAGATGCATCTACTTTTTGATAGATACATGAAGTAGTTATGA  
GATGGATAACTTTCTAAGAAGTTTTTAAAAAATGTATTAGTGAAGAAAAAATCACTAAAC  
AATCTGGTGTTATTTGTTGGG

>GmGeBP3

TGGGAGTGAGTCGGTTAGGCAAAGGGTCTAATGGGTGCTTTGCTTTACGGGTTTGTGG  
TGTAACTTTTCACCTACTCGGTTGCAATAAGAATGAGAATGAGAATCTGGGAGGTCGTTT  
ATTAGTTAGTGGACCAACCCAGTTGCCCCACATGATTTTCTTTATTGCTTAATTTAATAA  
GTTTTTGTCAACTTTTTATCAAATTATTATTATTGACTCAAATGTTGATTAAATATTTT  
ATGAATCTAATTACTATAATATATTCATATGACAAAGATTTTAAATTAACATTTACCTAA  
TGATTGTTATATATATTGTTATTTTTTATATTATTAATTACTTTAAAAATCATGTAAGT  
ATTTATAGTATAATTTTTTACAGTCATAATGTACCAAAATTAATTACACTTTAATTTGA  
TTTGCTTCTAAATATTTTTTATTATTTTTTATCCTTGTTAAAAAATTAATAATTTTTA  
TCATCACTTAACAATCAAGTTTCGTGTATGTTGTCACAAAATAATTGTTTGAATGATGT  
CATTATATAATAAAATCAATTAATAATATATTTATAAGACTAGAAACATGATTAAGTTTT  
TAAATTATTTGATTGAATCTCTCACAAAATATTGTAACCGATTAAATATATAGTAAATTT  
GATGTTAAAAATTTAAAAATAAATATAAAGCTAAGATTATGGAAAAAGAACTTATAATTT  
ATCAACAATAATATATTTTTATATAATAAATTAATAAGAGAAAAATATTATACATTGA  
TAATGTAAAAAATTAACACAGAAATCTCATCACAAATTAACATATATGGTAAATTTGTT  
AACTTTTAAATAATTATTTTAATTATTTTTCATTCTTAGTAAAGCTAAGAAAAAATTT  
ATTTTTTAATTTCTGTTTTACTTCTTTCTCCCGTAAAGATATTAATGGAATAAACTA  
TTTTTTCATTGAAATTTAAAAAATGAACATTTAAATATCCTTCAAAAACAAATAAATAGT

TCCAAAACATATAAAATGTAGTTCACCTTGTTATACAACAACTATTATTGCAAAAATGA  
GTGAATACAACATCATTAAGAATTTTCATCTTTAGACAAAAAGTGAATACCACAAGGGT  
ATCCTTTGTAATTGATACATGTTTTGTTAAACTGTCCATAAGAACCATTCTCTTTAAT  
CTCATAATTAGATGTTCTCAATTATTCACAAAAAAGGCATTCTCAATTCCAATATTCTT  
TTTTCTTTGCATATGCATTTTCATATATTATCATCACAATTATTCAAAAAAAAAAATATC  
TCTCAAATATCTCAAACATCATTTTTTTTATTTGTATGATTTTTTTAGAGAAAAGGAA  
TTGTATACTTGTAATAATAATCATCCAATTATAACCTATTATAACCTATTATGATAAATT  
TATTGACTTTTAAAAATAATTATTTTAAAAATGTTTACATCGATGTTTAACTAAAATG  
TTTTAATCTTAGATACACATTAACTTTTTGGACCATCTAAAAATTGGTCTTCCTTATAC  
TCTCTTATAGACACTACTATTGGGTTGACATTCATAAAATGATAAGAGCTTACTTGAGTC  
CAAATTGAAGAATCTTACACCATAGAAGTTTACACAAGCAAATTAAGTCAGTTTTTATT  
GTAATGTATTTTAAGCTTGTTAGAAAATATAGTTAGATGAACAACAAATTTTCTCTGATT  
TTGCTGTTAATGTCATCGAATAAGTATATGATTGTGATTGTCCTAGCTAAAAGTTTGTTA  
GGAATGCTTTGAAATTTCAACTAGTAATGAACGTTAGTTTGGGAGTTATTTGAAATCCTT  
GGCAATCCAATTTATTTATTTTCCAATTACTACTTGTGCATGCCATTCTTTAGAGAACTA  
CCACACCAATATAACAGCATAGATTCCATTTGAGAACTCCTTATTTGAAAGCAGCAGTGG  
GTTCTAGCTAGGATATTCCAC

>GmGeBP4

TTTGTTAATTGTTAGAGTTTGAGTTAACAATTCACCAAAGATAACAAATTTCTCATATCA  
TTTTCAAGGACTTGCTTTTCATCTTTGCTGCTAAATTCAGGAATATGAAATTTATTGTT  
GTTGGTTTTGAAATTTATAAAAAAATATATATAATTGCACATGTTTTATACTTTATTGAA  
TGAATTTTGCTTACAGTTTTATTTTTTAAATAAATTTTAACTAATAATAATATATTTAAA  
ATACTTTATATCTCAATAAAAAACAGTTTTTTGAAACAACCTGGTTAGTTGTAACCTCGGAT  
CTAAATTTATGAGAGTGTTTGGGAATATCCAGCAGAATGTACTACCAAAATCCCAATTCAT  
TTACGATAAATAAAATAGTGATTCCACACCATGATGTTTTGTCTCACCATCTATCACATA  
ATTAGGGCTACAACATCAAAATAAAAAAGAATTATATTACATATAAGAACTTTATAAAATA  
CATTATACAATTCATTTTTTTTCATTATCTCTTGCTTCACATCAATTATATATTATTGAT  
AACATGATTTTTCTACATGTAACCTTTATATTCACGGATAAACATGCACCCCATTTGAAGG  
TATATATAGGAAGAAAAAGAGAGAGATGAAAAAAAAAGATAGAAAATAATAATAAATATG  
ATAAATGGCGGAAAGTTTATAGAAATACAATTGAGTAACACATGTTTTTTTTTTTAGGCA  
TCATGCATATTAGTTAATTAACAACATAACATATATGGGAGGGGGGGGGGGGGGAAATG  
ATAAATCCTCCGAGACAAAGAGACCAATAAAGTCCGAACCATTCAAAAGCTTACACCTG  
TCAACTATTCATTAATTTTTTTTTTAAAAAATTCCTTCCAAATTGATTCTTGTTTCAC  
ATCTCTCTTTTTTTTAAAGATCCATGTCATCTCTTTCTAAATTTTCAGTCCAAAACCTTA  
TTCATGGATGAATCTCTTGGGATTATTTCAGAGCAAAGGAATAAAGAATCTCACCCACAAA  
AAGTTTATTTTCGTTCAATCTCAAATAAAAAATGGGTGTTGTTTAGATAGCCTTTGG  
GAAGAGCACACTTCCTCGTGTTGTTTACGAGAATCACAAACCTCGTTACCAACCTGAGGC  
ACGAAGGTTCTGGAGTTCGCCATTAATAATGTTTATGCCATCTAAGTGGAAGCTTGAATG  
TTATATGTTCTTTGTATAGTTTTGGGTTTACGCCATCTAATTAATGTTCTTTACTTGCCA  
AGATCCACCAGCTATTGTAACCTTTCTAATAATCCAACGTTGACACTTTAAATGAATAGG  
TACAAATCACTAAGAATGCCAAATACAAATTCATGAATAAATAAAACCAAAGTGTGTTA  
GAGTACACAAATGTCAGTTTCTACATTTGTAGGCTTTGAATTCCTCAGTTTGAAGTGC  
TCATCTGAAATGTTGGGTGCGGTGGGGGAGGGTGGAAGGTGGGATAGGGTGGTGGGTGA  
TTGTGTTGTTGAAATTCGTGGGACCGAAGGAGGAGAAGCTGTGTACAAGGGAGTTGTGGA

GGGAAGTGAAAATCATGTATGATTTGTTTAGTTGTACGTGAGTGATGAGGAAAGAAAACG  
AGAGAATGAAAGAGAATAAATGAACAAAAGAGAAATAAGTAAGAAATACGGTATCTTGAG  
TCATCTTTTCATTTTTTTTTCTTTTCAGGATATTTATGTGATTCATTCATTGTGCAGGTGC  
TTTCTCTAACCATAGTGCTCTATGACTATGAGACAATAAAAAATAAAATAAATGCTGACAG  
GTGTCAACCTTATGTAGTTCGATAGAGTAGTCGACTGATTTTGTTCGGTGGATATAGAAG  
TCTTTGTATATATATATTTTCTTAAAAAGTCTAACTCTCATAATTTTCATCCGAATTTGG  
ATCATATGATATGAATTTATAACGATATATTTTCCCTTATTATTGTGGAGGTAATAGAC  
ATGCATTCTATTGATAGCAAA

>GmGeBP5

GAGAGGCTAACGGTCCAGCTCCTCTAATCACAAATTCACAGGTTGTCAAATTTAATTAAG  
TTAAGAATTAATCTATTTGATAATTTTATCCCTTCGGCATTTCAATTATATTTTCAAAA  
AATATTTAATTATTAAATTCATTCACCTCGAGTTATCTTGTAATTAGTATTTTAACAT  
GATAAAAAATAAATTCACATAAATAAAAAATATTTTAAATATGTGAATTATATCATAAT  
ACAAATCTGTAATAATAAATAAAAAAGATAAAAAATAAAAGATGTTTTTAGTTATTGATAAT  
TTCTTTTAAAAAAATTATATTTGATTTTAAAAAAAGATAAAAAATAAATTGAAAGATAGA  
AACTGTTAAAAAAATCACGTACGTGCATAAAGATAAAAGAATAGTGGTTTGAGCTCAAGA  
TGGTTCGTAAAGAAAATTTGAGATAAGTATTCATTAATTTACAAATAAAAAAGATAAAAA  
TAGATTGAAAGGTAAAACTGTAAAAAAATCAAGCATATATGCATAAAGATAAAAGAA  
TAGTGGTTTGAGCTTGAGATGGTTCGTAAAGAAAATTTAGATAAGTATTCAATCAAATC  
AAATTAGAGAAATATATTTGAAAGAGGCAAATGATAAAAAAAAAAAAAATTGCTCAAGATT  
ATGATACTAAGATAATACACGTGACTCGATAAGAATGATAATAACTTTTAAAAATATTAT  
TGTTTAAGGAAAAAAAAATCTAAAAATATTTTCATCTAAGAAAATCTTTAAAGTAATCG  
TACTCATAATGAGAATTCGAATTTGCAACATGAGAGTACATTGTAAAAACAAATCTTTGT  
TTTTAAATAATTAACCTTAAATTTAGATGCAAGCTAAGGTGATTCAATACAAGATATGA  
TTTATGGTCAACAAGTTTATAATGACCGTAAATTTATCAATTATCAAGACTTAATAAAA  
TATTTAGAGCATTCCAAATGTAATTTATTCTAAAGATCTCAAAGTTAGGATATGTGTCA  
TATCAATTTTTAAGAATTTTACTTACTTTTTATTCAAATAATAATCTCATTAGAATTTG  
ACTTGATTCCACGTGCTATTTACATATTTTACCATGTGTGCTCTCTTTTTATTTTT  
AAAATTTCAATCTTTTTTTTTTTTCAATTTGCAAGCTTTTACTTTACGGGGGGCAAAT  
TGAAACCCAACAGATTAAATGCCTTTCTCTCAAACCTACTCGTCTCTCTGAAAAATTCTC  
AACCATGATGTCGTGGTTCCCCCATCACACCGTCGAACCAACCCGCCATTCTCTC  
TGGTTTCACACTTCTAATTCTGCATCTCACGCTTCCTTTCTTTCAAACCTCTATGAAAGC  
TATAGGATTGAAATCGATGGAGAACGGATGTCTCTCTTTGCCGGATGCATGCACCCAAAG  
GACGACTCTGTCTCTTCTGCACATCATTATAGCCCCCTGAACCGGTTGGTCATCGAGG  
GTCTCCTCGCAACAACATAGTGCTGGCATGTTAATGGTGAATTTGATTTTGAGTTAAATT  
ATTCATTTGATTTCTATAATTTTCATGATTCTTATTTTTTTAATCTTATAGTTTAAAAAT  
AGACTTTTTAGTCTATATAATTTACACTTAAATCCTTTTTTAGTGCATGTAGTTTGAAA  
ATGATCTTTTTTAGTCCGTTTCATGAGTCTTACTTTTTTAGTTTTATAGTTTTCAAATTA  
TAAATACTAAAAAGAAATCAAAATGTAAATGATAGGGACTAAAAAGATCACTTTCAAATC  
ATAAAGACTAAAAAGATAAGAACCATAAAATTATAGGGACTAGATGAGTAATTTAACCTT  
TGATTATGCTTTGATTTTGAAATATTCCAAAAAGCTTGAAATGTGTTTTTAAATAAAT  
ATAAGAATTGTTTTTTCAACAATAAAATAAATATACAATAATGTTTATATTTCTTTAAT  
TTATATACAATAGAAATATAG

>GmGeBP6

ATTATAAAATTTATAATTTTTCTTGTAATTTCAAGTACATATTCAAGGAATTAATCA  
AATCAATATAATAAAATCACATATCAAATTATATAGATAAGATTCTTATAAATGAAATAT  
ACATTTAAATTTCCTTTTTATGTGTCAAATGGGATCAACTTGATTTTACCCACCAGAAAT  
TCTCAAAGAATAAATTAATAAAAAATCAACTCACTTTTTTCTGTAATATTATAAATAATC  
AATCTAACTCAACCTATCATAAATTCATAGACTAAATAAGTTTACCTACCTAAAAATAAAA  
GATAAAAAATACTGTAATTTTTATTTACAATACTTTTTTTAATAGACAAAATAACTTTT  
TCTAAAGGTAGAAAAAGCAAAAAAGAAAAATTATTATATTACTACTACAAGGTAAGCCA  
CGTTACACGGTGTCAATAGAATATAATCGTCATTAAAAGAATGCAATTTATGTTAGTACG  
GATGGTTCAATTTTGATTTTGTGATAAGTTTGTGAGATGGAAAAATACAATTATTCAATC  
ATAAAACATTATGTATTTATTAATTTTTAAAATAATTATCTTAAATAATTTAAATTATA  
TTTACACAATAATGTAACTTGTTTTACATTATAATTACATAACGAGTAACTTAAAAAA  
TAATTCCTTACTTTAAATCATAACTTGCAAACAACACCTCAATCTCACATTCAATTATC  
AAAATTAATAATCATCAAAAGAGATAAATGTTTTATATATATTATTAACCTTCATTCC  
AACTAAATACTGGAAAAAGCAACTGAAACTACAAAGTTATAATTAATTCCTCTCACTC  
TCTTAGGAGTTGTATTTGGAGAGAAGAAATTAAGTAAAAAATAAAGGTATGAGACCCA  
CCTAAAAATTTAATTTTTTTTTATCCTTTTCTCCTTATCTGATCTCAAACCAAACCAAGA  
CTTAGTTTAGGCAGCATGTGTTGGTGTGAGTTGATAAATGAAGGAACGGTTTTTTTCCC  
TCTTTAGTATATGCAAAGCTCTAACTCATGAAATAATTTGATGCATCATAGGATTCAATT  
CGGTGACCTGAGTTTTATCGATTCAAACCTGTAATGGGTGAGTTGGACAAGAATGTAAA  
TATTGTTGTCAATAAGATCTCAATTGCAGAAGAATTAATGATGGCTTCTTAACCACCATA  
AAATAACCATGAATGACGACTTTGTGAACATAGTCACAACTTCATTTGTAAAGAACTTG  
TGACCGAGAAGCCATTAGTGGTGACTTCAAGATAATTGGTAAATCCAATAATCGTTATAT  
CATCTCGTCTACGCCATTAAATATTTCAAGTAAAGCTTGATAATTGATAAGTCCACTGATC  
ATTATAAACTTCTCCACCATAACCCACAGCTTGATTGAAGCACCTTAGCTTGCAATTA  
ATTTAAATTTAAATTATTTAAAAATAAAGTTAAAGATTGTTTTTTACAATGTACTCTTA  
TGTTGCAAATTCGAATTCCTCATGTTGAGTAAGAATATTTTAAATGATTTTTTTATAGATT  
TTTTTCCCTTAAACAATAATGTTTTTAAAGCTACTATCATTCTTATCGAGTCACGTGTAT  
TACCTTAATATCATGCTTTGAGGGAAAAAATTATTGTTTGCTTCTTCAAATATATTTTT  
CTAATTTAATTTGATTGAATACTTATTTCAAATTTTTCTTTAGGAACCATCTTGAGATCA  
AACCCTATTCTTTTATCTTTATGCATATACTTGATTTTTTTTTTAAGCGCTTATATATA  
TCTTCCAATCTATTTTTGTCTTTTTATTTGTAAATCAAATATCACAATTTTTTAAAGAA  
ATTATCAATAAGTAAATCAAATAAATTTAATAATTAATATTTTTTGAAGATATAATTGA  
AATTTTGAAGGGGATAAAATAAAATTATCAACTTTTTTTTATCAATTATCTTCTTAATTT  
GTGATTAGGGGAGCTGAACCG

>GmGeBP7

AACCAAACCCACGTATTAATTTTCTATTCCCTATTTTAATTTTTCAAGGAATGTTCCCT  
GTTGTTTTCGACAAAACGCAACGTTGCAGTATATGTTTTATTTTTTAATCGATTAAAA  
ACTATCCTCTACATTTTCAAATACTTAATAATTTTTTTTCATTGATACAGATATTTTTAT  
TATTAATAATTTAAAAATCAGCTGATAGAAAAAATTAGTGTTTACAATTTGTAAGTTAAA  
TTAATCCAGTAATTTCCAAAAGTATTTAGAAATTTTAAATTAGGTCCTCAAATTAATAA  
AACTACAATTGAGTATTTTATCTTTAATTTTTTAAATTGATCTCCTAGATTTTTTAAAA  
CCACTACAAATGATCATTTTCTGGCTATAAAAACTATCTTCAGGGGCTCAACTACAATAA  
ATTTACAAAATCAAGACCCTAATTATAGTTTTTTTAAATTAAGGAACCTAATAAAATATTC  
TAAATTTGTTTAGAGACATACTGATTAATTTAACATAATTTGTAATATTTTTTCACTATAT

TTATTGTTAACTGAATGAAGTTAAATATTAATTAAAAAGTTAATGAAAGTAAAAAAAAA  
AGGTACTTCGATTATATAACTAATTAAGAAGACAAAATATTCATTTGAAATGTACAAA  
AATGAGAAAAATATCTCGATCTTAATAATGAGAAATTTATTTTATAAAAAATATATTTT  
TAACATTTCAAGAACTTTTAGAAAAACAATCTGTGTTTGAATTAATTTAAATAAATA  
AAATGTTATTAAAAAATATTGACTATTTTAAAAATTCTTGAGTATTCTAATAAAAAATATT  
ATATTGTTTATAAAAAACATATATAGCATGTAATACTGTGAAATTTGTAGGTTGTTAAA  
TCACAAATAAAATACTAATTAATTTTAATCATGAGAGAATCATTGAAAACCTTGGCTTT  
AAAATATATAAAAAATAATAATAAAATTTTCATTCAATACAAAAATATAATCTTTATGCTA  
ATTATTTTTTTGTGAAATTTTGGTAGAACAAAGAGATACTCCGATATAATTGGACAGAG  
ATAATTAATATTAATTTGATCACAACAAATCATAGGAAATAATCTTAAAAACCTATAC  
AACATAGCAATTATATAAAAAAAAAAACTGTGCATAATTATAATATCATAACACACAT  
AACACAAATTATATCATACAAATTTAGGATGGGTTTTAAACCAAATTTAGAACTTAAT  
GGACTCCCATACGTGCTGAAGTATGAGTTAAATGGGCCGCAATAAGAAATGCAAAATGGG  
ATTCGTGTGTTAAGAAAACATCCAAGAGAGGAATGTCAAGTTAGAAAGTTTCGCAAATAA  
CTATGGCAGACGCTTCGCAAATGAATCGAGGAAGGTCAAGTTAGAAAGTTTCGCAAATAA  
ATAGGGAAGTGAAGAGACAGGCATGATAGGAAACAAGTGAGAAGAAGGATATTGATTGT  
TCGACGCAAGAGAGCTGAGAACAGAAAACATTGGAGCCTAGTTTCACCACCAAGTGGATT  
AGTGGAAGGAACGTGCAAGCACGTGAGAGTTAAATCTAAAAGTGAGTCGTAATCAAGTG  
AGACCAACACAATCAATATCGTTTTGCTTTTAAATGACTGTAGAGTTAACTTTCCAAT  
CCGACATGAACAACACCCAATTTGTCCGAGTTCATAATAAAACAATACCGCAACGATTC  
AACTTAATTTGCAGGTGCGAACTAGTACAGTCAAACGAGGTTATTAATTCCTATTTTTA  
CAATGGGATTTGACAACTAACGCCTACATAAATCAGCCATTACTAAAAGAGCCAAGCTT  
CAATACATTTTTATTTTATTTTAACTCCTGAACTACCACCAAAACATACATAGGCTGTTGA  
TTTTGACTCCAACCGAAAAACAACATAATCTGACGATGATGAGAAGCAACGATAGAGAC  
TGGAGAATTTATGATAAATTA

>GmGeBP8

CCTTTTCCGCGTATTTGAGTATCAAGCTAGCCGTTGTTTTGCATTTACTATCAATAGA  
ATGCATGCTTATTACCTCCACAATATCTTGTTACAAATTCACATCTGCATAATCCTAATT  
TGGATTAATAATTACGAGTTAACTTGTTTTCTTATTTTTATTTTTTAAATATATATTTG  
TTAGTTGTTAACTAACGCAGTCATCATGCCTAAAAATAAACTTATGTTACTCAATTATA  
TTTTTATAAATTTCTACTATTTATCATATTTGCTATTTTCTATCTTTTCCTTTTATCTC  
TCTCTTTTCTCTACCTATATATATCTCTACCTATATATACCTTAAAAATGGAATGTATGTT  
TATCCAAGTTCAATCAAAAGTAATATATGAGAAGTGTAGAAAAATCATGTTATCGATAAT  
GTATAGTAATTGATGTGATGGAAGAGATAATCGAAAAAGAAAACGGAATTGAAAAATGTA  
TTTTATAAATTTTATTATATCTAATTAATTTCTTTTTTATTTTAAATGTTGTTGCCTTAAT  
GATGTGATAGATGGTGAGAGGAAAACCATATAATGTGAAATCACTAATTTATTTATCCT  
AAATGAATTGGAATTTGATTTGGTATTATACTCTATTGGGTATTCACAAATACTCTCTTA  
GGTTACAACCTTACAATATAATTTGTTTTAAAGATCTGTTTTTATTGAGTAAAAACAAGTC  
TTTTAATATATTATTATTAGTTAAATTTATTTAAAAATATAAACTATAAGCATAGTTC  
ATTCATAAAAGTATAAAACATGTGCAATTATGCATTTCTAATAAATTTAATATTACCTTA  
AAAAATAATAAATTTCAATTTTCTGAAAATTGATAGTAAAGATGAAAAGCAAGCCATTGA  
AAAAGATGAGATTTGTTATCTTTGGTGAATTGTTTCAGTCAAACCTCAACAATTAACAAAT  
CCGGTCACATTTGGTTTCTAAGTCCTATCTTTCAAATGAAAAAAAAATTAAGATAGAA  
AAATCTGAATATGTAGTCTTCAACCGTTGGATCGAAAAATAACATATTAACGATGTGAAT

GTACGGAAGGAACAAATATGCACTGAACTAAGTAAGTGTCTCTTCTCAGAGAGGAGGAG  
TTGTCTAAACCTAAAGGATTAGTTCCTCGAGTTTAGTTAACTCAACAGCTTAACACAAAT  
AATGCGCCAGCTTTCCTCGACTATAGCGCGAGTAGAGTCTAAGTGTTTATAGCCGTAGCG  
ATATAAACAGAATACTCATCAGAGCCGTAGAAACATGTACATATAGAATACGAGAATGT  
AACTAGCCCCAAGTTACAGCAGGCTCTTTCTATTATGAAATGTTTCATCTGTATCTATTT  
ATTGGTTAGTTTAGTATACAGGATCTCTACCTTCTTTGATTTTGTGTTATTCGATCTTTC  
GGTGTACCCCGTACTTCCTAGAAGTAGTCATTTCATTCATCTGGTGGATCCAACCTCATTG  
TGGGTGTGGTTTCACACGAAGGTTTCGAGCTCAGGTTGGACCTCTTTCGACCATCATTCAT  
TTGTGATCAAGAGGACTATACTATTGATAGATGAGTGATTTCATTACATCGATGAAATG  
CAATGCACTCAAGTAACTTTTGAATGATGGTCTTGTGTTGAGTCAGGATACTGACTTTTGA  
CTAAACATTAAGTTAGAGTCCAAAAATAACTAGACTTAAAGTTGGTAAAATCAAACCTCAG  
TCATATCCAAAGTATATTTTTTTTAATGTTTCATTAGAAATTTGTTAATAAAATACACAAA  
TATATACTATCAATTCAAATATGTGAACATCAATTGAATAAGTTCTTTTACCTTTAATGA  
TGTTGATTTTGTGTTTAAAAATATAGGTACATTATAAATCGATAAAAGTAGACATTGTT  
ATCTTTAACTATTTTGTAAATTCAGTGTGAAAAATGTGAGTTGAATACTATAATTTAT  
TAATATTTGTGTAATGATAAA

>GmGeBP9

ATATTTAATCATGTTTAAAGTTTTTTTATTTCTCCCTAAATATATATTTTACACAAATTA  
AACTCAAATTTTTCTCATAAATTCAATGTATATTGACAATTGAGTTATACCCATTAAAC  
AAAAATCATTATCATATAGCTCAAATCCTGCAACAAATGAGCAAGTAAACTACTAGTC  
TTATTAGTTATGAAATTGTTTAAAGATAAATATTTATTTTATATAATACTTAAGATTATA  
ATAAATAAATATTTTGAAGATATGTTATATTTAAATTTATAATAAATAACTTAACTA  
TAATATAAGGTTATTTGAATTATTAATTAATTAAGTAAAGTAAATTCACCTTAGAGA  
TATAAATAAAAGAGATATATAGTTAAAAAGATCAACTATACCATAAAAGAAAATATAAGA  
ATGTCTAATTGTGAGTTAAAGAAAAACAAGAGTCTCACATCATTCTTATTTGATAGATGCA  
GACGTGCAAATATTTCTTTTAAATTTTAATAACTTAAGAGATGTATTTATAAAGAGAT  
AAATAAATAATGAATCATGTTGTTCTGTATTAGCGAGAGTTAAGATTATATGATTGTAGT  
CATATTTTTATGATATATTTATATTTTCTTTGCATATCATTCAAATTTGACTATGAA  
CATATAATCTTAACTCTCTTACTAAGGTATGAACCACATGATTTGTTGTCTCCTTTAAA  
ATTACCTATAAGTTATTAATTAAGTTTGAAGAAGATGTTACCTATTGAGAGTAT  
AAAAAGTTTATGCAATTACAATTGTCACTACAAAATTATTTATAATTGTTAGTACATA  
AATATTAAATTATTGAGACAGTTGAAAAATAAACTTTTGAATGACTGTGATGATAATAT  
ATGAATATGAAAAAGTTATATATTGACAGTGTAATTTTACAAATCCATTCAATTAC  
AATTTATTATTATGTATGATAAATTTATTGATTTTAAAAATAATTTTTTAAAGTAATTC  
AAACAGTAATAATTTATGATTAGATATAATTGTAAACTATTAGTGAATAGGCATTATTA  
AACTTATGTATAAAATGCATATGCAAAGAATATATATATATTCAAGTATATGGAAGAAT  
AGACATTGAGAATTTCTAATTATGAGAATAAAGAGAATCAAATCTCATTCTACAATCTG  
TTTATTTTAATTTATATATAAGAAAATATTATTGTTAATAAATCATAACTATTTTTTC  
CATAATCTTATCTGATTTATTTTAAATTTAACATCAATTTTACTATATATTTGATTG  
GTTTACAATATTTTGTGCGAGATTGGATCAAATAATTTAAACTTAATCATATATTTAG  
TCTTATAATAATAATTATATTTTATGTTGATTTTATTATATCAATAACATATCATATATA  
TAATCACATCATTTTCATCTCAAGTTCAAGTTTATATATATAATTATATTATTAAGAAA  
GAATTTATAATAATTTATCTTAGTCAAACATAATTATCTTCTTAAAAAATATCTATCA  
TCTTCAAAAAAATAATAATCTCATGATTTAAAAAATATCTTAGTCAAGGATAAAAAA

ATAATAAAATATTTAGAAGACTAAATCAAATAAAAGTATAATTTAATTTTGATATATTA  
TGAGCGTAAAAAAATTATACTATAAATTAGTTATATGGTTTTAAAAAATAAGTTTTT  
TATTACAAAATTACAATTTTATCATCTTATATAACGATAAAAAAGTAAATGATAATGTAA  
AATCTTGACCATATCAATATATTACAGTAATTAGATTCATAAAAAATATATTTATAAATAT  
TAAATCCACATTTGAGTCAATAATAATAATTTAATAAAAAAGTTGACAAAAGCTTATTA  
AATTAAGCAATAAACAAAATCATGTGGGGCAACTTGGTTGGTCCACTACCTAATAAACCA  
CCTCCCGGATTCTCATTCTCA
